# Supplementary material for: Mapping and Validation of BrGOLDEN: A Dominant Gene Regulating Carotenoid Accumulation in Brassica rapa
Source: MDPI journal article supplement (doi:10.3390/ijms232012442), 2022-10-18
Supplement: s1 [file s1]

## Supplementary Tables

**Table S1 Qualitative and quantitative detection of carotenoids in Chinese cabbage**

| Compounds                      | 1900262-1 | 1900262-2 | 1900262-3 | 1900264-1 | 1900264-2 | 1900264-3 | Pvalue<br>(1900262_vs_1900264) |
|--------------------------------|-----------|-----------|-----------|-----------|-----------|-----------|--------------------------------|
| $\beta$ -Carotene              | 13.4      | 18.4      | 11.7      | 119       | 108       | 93.8      | 0.003833015                    |
| $\alpha$ -Carotene             | 0.253     | 0.317     | 0.364     | 1.62      | 1.17      | 1.36      | 0.010893401                    |
| Lutein                         | 61.5      | 96.6      | 53.3      | 201       | 142       | 170       | 0.011060411                    |
| Neoxanthin                     | 3.93      | 5.44      | 3.14      | 8.75      | 4.49      | 5.25      | 0.269787026                    |
| $\beta$ -Cryptoxanthin         | 1.27      | 1.01      | 0.93      | 4.47      | 2.53      | 3.42      | 0.04630673                     |
| Antheraxanthin                 | 0.214     | 0.262     | 0.162     | 0.624     | 0.271     | 0.502     | 0.12574915                     |
| Violaxanthin                   | 2.3       | 2.52      | 1.89      | 4.19      | 2.31      | 2.9       | 0.242896814                    |
| (E/Z)-Phytoene                 | N/A       | N/A       | N/A       | 16.7      | 16.2      | 12.8      | N/A                            |
| lutein laurate                 | 1.04      | 1.1       | 0.928     | 1.2       | 1.04      | 1.1       | 0.257707013                    |
| $\beta$ -cryptoxanthin laurate | 0.737     | 0.573     | 0.501     | 1.35      | 0.573     | 0.471     | 0.560242992                    |
| violaxanthin myristate         | 0.0597    | 0.0518    | 0.0312    | 0.07      | 0.0425    | 0.0462    | 0.682158456                    |
| lutein palmitate               | 1.34      | 1.7       | 1.3       | 2.31      | 2.31      | 2.27      | 0.020708166                    |
| lutein dimyristate             | 0.965     | 0.976     | 0.911     | 1.19      | 1.05      | 1.03      | 0.094411035                    |
| lutein dilaurate               | 1.03      | 1.14      | 0.928     | 1.22      | 1.17      | 1.22      | 0.099267502                    |
| violaxanthin palmitate         | 0.0519    | 0.107     | 0.033     | 0.111     | 0.122     | 0.129     | 0.118321896                    |
| lutein myristate               | 0.975     | 1.1       | 0.934     | 1.16      | 0.992     | 1.16      | 0.25031158                     |
| Capsorubin                     | 0.202     | 0.179     | 0.348     | 0.0934    | N/A       | N/A       | N/A                            |
| Lycopene                       | N/A                            |
| Zeaxanthin                     | N/A                            |

|                                   |     |       |     |       |       |       |     |
|-----------------------------------|-----|-------|-----|-------|-------|-------|-----|
| $\gamma$ -Carotene                | N/A | N/A   | N/A | N/A   | N/A   | N/A   | N/A |
| Astaxanthin                       | N/A | N/A   | N/A | N/A   | N/A   | N/A   | N/A |
| Apocarotenol                      | N/A | N/A   | N/A | N/A   | N/A   | N/A   | N/A |
| Phytofluene                       | N/A | N/A   | N/A | N/A   | N/A   | N/A   | N/A |
| Capsanthin                        | N/A | N/A   | N/A | N/A   | N/A   | N/A   | N/A |
| $\epsilon$ -Carotene              | N/A | N/A   | N/A | N/A   | N/A   | N/A   | N/A |
| $\alpha$ -Cryptoxanthin           | N/A | N/A   | N/A | N/A   | N/A   | N/A   | N/A |
| antheraxanthin dipalmitate        | N/A | N/A   | N/A | N/A   | N/A   | N/A   | N/A |
| lutein caprate                    | N/A | N/A   | N/A | N/A   | N/A   | N/A   | N/A |
| lutein stearate                   | N/A | N/A   | N/A | N/A   | N/A   | N/A   | N/A |
| 5,6epoxy-lutein dilaurate         | N/A | N/A   | N/A | N/A   | N/A   | N/A   | N/A |
| 5,6epoxy-lutein-caprate-palmitate | N/A | N/A   | N/A | N/A   | N/A   | N/A   | N/A |
| lutein dipalmitate                | N/A | 0.933 | N/A | 1.13  | 0.998 | 0.992 | N/A |
| lutein distearate                 | N/A | N/A   | N/A | N/A   | N/A   | N/A   | N/A |
| lutein dioleate                   | N/A | N/A   | N/A | 0.924 | N/A   | N/A   | N/A |
| lutein oleate                     | N/A | N/A   | N/A | N/A   | N/A   | N/A   | N/A |
| neochrome palmitate               | N/A | N/A   | N/A | N/A   | N/A   | N/A   | N/A |
| rubixanthin caprate               | N/A | N/A   | N/A | N/A   | N/A   | N/A   | N/A |
| rubixanthin laurate               | N/A | N/A   | N/A | N/A   | N/A   | N/A   | N/A |
| rubixanthin myristate             | N/A | N/A   | N/A | N/A   | N/A   | N/A   | N/A |
| rubixanthin palmitate             | N/A | N/A   | N/A | N/A   | N/A   | N/A   | N/A |
| violaxanthin dibutyrate           | N/A | N/A   | N/A | N/A   | N/A   | N/A   | N/A |
| violaxanthin laurate              | N/A | N/A   | N/A | N/A   | N/A   | N/A   | N/A |
| violaxanthin palmitoleate         | N/A | N/A   | N/A | N/A   | N/A   | N/A   | N/A |
| violaxanthin dilaurate            | N/A | N/A   | N/A | N/A   | N/A   | N/A   | N/A |
| violaxanthin-myristate-caprate    | N/A | N/A   | N/A | N/A   | N/A   | N/A   | N/A |

|                                  |       |       |     |         |      |         |     |
|----------------------------------|-------|-------|-----|---------|------|---------|-----|
| violaxanthin-myristate-laurate   | N/A   | N/A   | N/A | N/A     | N/A  | N/A     | N/A |
| violaxanthin dimyristate         | N/A   | N/A   | N/A | N/A     | N/A  | N/A     | N/A |
| violaxanthin-myristate-palmitate | N/A   | N/A   | N/A | N/A     | N/A  | N/A     | N/A |
| violaxanthin dipalmitate         | N/A   | N/A   | N/A | N/A     | N/A  | N/A     | N/A |
| violaxanthin-myristate-oleate    | N/A   | N/A   | N/A | N/A     | N/A  | N/A     | N/A |
| violaxanthin dioleate            | N/A   | N/A   | N/A | N/A     | N/A  | N/A     | N/A |
| zeaxanthin myristoleate          | N/A   | N/A   | N/A | N/A     | N/A  | N/A     | N/A |
| zeaxanthin palmitate             | N/A   | N/A   | N/A | N/A     | N/A  | N/A     | N/A |
| zeaxanthin-caprate-laurate       | N/A   | N/A   | N/A | N/A     | N/A  | N/A     | N/A |
| zeaxanthin dilaurate             | N/A   | N/A   | N/A | N/A     | N/A  | N/A     | N/A |
| zeaxanthin-laurate-myristate     | N/A   | N/A   | N/A | N/A     | N/A  | N/A     | N/A |
| zeaxanthin dimyristate           | N/A   | N/A   | N/A | N/A     | N/A  | N/A     | N/A |
| zeaxanthin-laurate-palmitate     | N/A   | N/A   | N/A | N/A     | N/A  | N/A     | N/A |
| zeaxanthin-myristate-palmitate   | N/A   | N/A   | N/A | N/A     | N/A  | N/A     | N/A |
| zeaxanthin dipalmitate           | N/A   | N/A   | N/A | N/A     | N/A  | N/A     | N/A |
| zeaxanthin-palmitate-stearate    | N/A   | N/A   | N/A | N/A     | N/A  | N/A     | N/A |
| zeaxanthin-oleate-palmitate      | N/A   | N/A   | N/A | N/A     | N/A  | N/A     | N/A |
| $\beta$ -cryptoxanthin myristate | N/A   | N/A   | N/A | N/A     | N/A  | N/A     | N/A |
| $\beta$ -cryptoxanthin oleate    | N/A   | N/A   | N/A | N/A     | N/A  | N/A     | N/A |
| canthaxanthin                    | N/A   | N/A   | N/A | N/A     | N/A  | N/A     | N/A |
| echinenone                       | N/A   | N/A   | N/A | 0.00634 | N/A  | 0.00444 | N/A |
| $\beta$ -citraurin               | N/A   | N/A   | N/A | N/A     | N/A  | N/A     | N/A |
| $\beta$ -cryptoxanthin palmitate | 0.438 | 0.496 | N/A | 0.926   | 1.19 | 0.742   | N/A |

---

Table S2 BSA-seq raw data

| Generations                                  | Clean Reads | Clean Bases    | Q30 Percentage (%) | GC Percentage (%) | Mapped (%) | Properly mapped (%) | Average depth | Coverage ratio 1X (%) | Coverage ratio 5X (%) | Coverage ratio 10X (%) |
|----------------------------------------------|-------------|----------------|--------------------|-------------------|------------|---------------------|---------------|-----------------------|-----------------------|------------------------|
| P <sub>1</sub> (1900262, <i>aa</i> genotype) | 60,064,028  | 17,964,551,756 | 92.46              | 37.72             | 98.08      | 95.34               | 34            | 94.61                 | 92.60                 | 91.06                  |
| P <sub>2</sub> (1900264, <i>Aa</i> genotype) | 71,027,935  | 17,964,551,756 | 92.97              | 37.61             | 98.16      | 95.12               | 41            | 97.00                 | 95.56                 | 94.28                  |
| BC <sub>1</sub> NGP                          | 90,277,996  | 17,964,551,756 | 93.33              | 37.62             | 98.41      | 95.91               | 48            | 97.93                 | 96.79                 | 95.50                  |
| GP                                           | 89,932,917  | 26,905,462,562 | 92.69              | 37.36             | 98.39      | 95.06               | 48            | 98.03                 | 96.90                 | 95.65                  |

**Table S3. All gene information in the candidate region**

| <b>Gene_ID</b>   | <b>Pfam_annotation</b>                                                                                                                                                                                             | <b>Swissprot_annotation</b>                                      |
|------------------|--------------------------------------------------------------------------------------------------------------------------------------------------------------------------------------------------------------------|------------------------------------------------------------------|
| BraA09g003880.3C | NB-ARC domain;; NLI interacting factor-like phosphatase                                                                                                                                                            | Probable disease resistance protein Atlg59620                    |
| BraA09g006110.3C | Sigma 54 modulation/S30EA ribosomal protein C terminus;; Sigma 54 modulation protein / S30EA ribosomal protein                                                                                                     | Ribome-binding factor PSRP1, chloroplastic                       |
| BraA09g007180.3C | --                                                                                                                                                                                                                 | --                                                               |
| BraA09g009100.3C | --                                                                                                                                                                                                                 | Protein TOC75-4, chloroplastic                                   |
| BraA09g003900.3C | KIX domain                                                                                                                                                                                                         | Probable mediator of RNA polymerase II transcription subunit 15c |
| BraA09g009200.3C | Domain of unknown function (DUF4283);; Zinc knuckle                                                                                                                                                                | --                                                               |
| BraA09g008480.3C | Ring finger domain;; zinc-ribbon;; Zinc finger, C3HC4 type (RING finger);; RING-like zinc finger;; Zinc finger, C3HC4 type (RING finger)                                                                           | E3 ubiquitin-protein ligase CIP8                                 |
| BraA09g005500.3C | --                                                                                                                                                                                                                 | --                                                               |
| BraA09g005230.3C | C2H2-type zinc finger                                                                                                                                                                                              | Zinc finger protein 4                                            |
| BraA09g007190.3C | --                                                                                                                                                                                                                 | --                                                               |
| BraA09g008450.3C | Ras of Complex, Roc, domain of DAPkinase;; Ras family                                                                                                                                                              | Small GTPase LIP1                                                |
| BraA09g005210.3C | Ribosomal protein 60S L18 and 50S L18e;; Ribosomal proteins 50S-L15, 50S-L18e, 60S-L27A                                                                                                                            | 60S ribomal protein L18-2                                        |
| BraA09g008700.3C | --                                                                                                                                                                                                                 | --                                                               |
| BraA09g008470.3C | 4-alpha-glucanotransferase                                                                                                                                                                                         | 4-alpha-glucanotransferase DPE1, chloroplastic/amyloplastic      |
| BraA09g006480.3C | Sugar efflux transporter for intercellular exchange                                                                                                                                                                | Bidirectional sugar transporter SWEET12                          |
| BraA09g008260.3C | Rad51                                                                                                                                                                                                              | DNA repair protein XRCC2 homolog                                 |
| BraA09g005490.3C | tRNA synthetases class I (E and Q), catalytic domain;; tRNA synthetases class I (E and Q), anti-codon binding domain;; Glutathione S-transferase, C-terminal domain;; Glutathione S-transferase, C-terminal domain | Glutamate--tRNA ligase, cytoplasmic                              |
| BraA09g010030.3C | Histone-like transcription factor (CBF/NF-Y) and archaeal histone;; Core histone H2A/H2B/H3/H4                                                                                                                     | Nuclear transcription factor Y subunit B-7                       |
| BraA09g009810.3C | Rhodanese-like domain                                                                                                                                                                                              | Thiulfate sulfurtransferase 16, chloroplastic                    |
| BraA09g005440.3C | PurA ssDNA and RNA-binding protein                                                                                                                                                                                 | Transcription factor Pur-alpha 1                                 |
| BraA09g008370.3C | Ribosomal proteins 50S-L15, 50S-L18e, 60S-L27A                                                                                                                                                                     | --                                                               |
| BraA09g005150.3C | Rapid ALkalinization Factor (RALF)                                                                                                                                                                                 | Protein RALF-like 33                                             |
| BraA09g009170.3C | Helix-loop-helix DNA-binding domain                                                                                                                                                                                | Transcription factor HEC1                                        |

|                  |                                                                                                                                     |                                                           |
|------------------|-------------------------------------------------------------------------------------------------------------------------------------|-----------------------------------------------------------|
| BraA09g008630.3C | Cyclophilin type peptidyl-prolyl cis-trans isomerase/CLD                                                                            | Peptidyl-prolyl cis-trans isomerase CYP38, chloroplastic  |
| BraA09g008170.3C | Alternative oxidase                                                                                                                 | Ubiquinol oxidase 2, mitochondrial                        |
| BraA09g006530.3C | Ribosomal proteins 50S L24/mitochondrial 39S L24;; KOW motif                                                                        | 50S ribosomal protein L24, chloroplastic                  |
| BraA09g005310.3C | Drought induced 19 protein (Di19), zinc-binding;; Stress-induced protein Di19, C-terminal                                           | Protein DEHYDRATION-INDUCED 19 homolog 6                  |
| BraA09g009060.3C | WD domain, G-beta repeat;; Anaphase-promoting complex subunit 4 WD40 domain;; Eukaryotic translation initiation factor eIF2A;; LisH | WD40 repeat-containing protein H15                        |
| BraA09g006210.3C | Dipeptidyl peptidase IV (DPP IV) N-terminal region;; Prolyl oligopeptidase family;; X-Pro dipeptidyl-peptidase (S15 family)         | Probable glutamyl endopeptidase, chloroplastic            |
| BraA09g006880.3C | NYN domain;; Zinc-finger of C2H2 type;; Zinc-finger double-stranded RNA-binding                                                     | --                                                        |
| BraA09g009890.3C | Protein tyrosine kinase;; Protein kinase domain                                                                                     | Calmodulin-binding receptor-like cytoplasmic kinase 3     |
| BraA09g005240.3C | --                                                                                                                                  | Zinc finger protein 3                                     |
| BraA09g007440.3C | Ras family;; Ras of Complex, Roc, domain of DAPkinase;; ADP-ribosylation factor family                                              | Rac-like GTP-binding protein ARAC10                       |
| BraA09g008130.3C | --                                                                                                                                  | --                                                        |
| BraA09g007360.3C | POT family                                                                                                                          | Protein NRT1/ PTR FAMILY 2.11                             |
| BraA09g006800.3C | Nuclear transport factor 2 (NTF2) domain;; RNA recognition motif. (a.k.a. RRM, RBD, or RNP domain)                                  | Nuclear transport factor 2                                |
| BraA09g009380.3C | --                                                                                                                                  | --                                                        |
| BraA09g007450.3C | TFIIS helical bundle-like domain;; BAH domain                                                                                       | --                                                        |
| BraA09g006660.3C | TCP family transcription factor                                                                                                     | Transcription factor TCP7                                 |
| BraA09g005850.3C | BAH domain                                                                                                                          | Protein ANTI-SILENCING 1                                  |
| BraA09g005050.3C | --                                                                                                                                  | Uncharacterized protein At4g28440                         |
| BraA09g009720.3C | Oxidoreductase NAD-binding domain                                                                                                   | Ferredoxin--NADP reductase, leaf isozyme 1, chloroplastic |
| BraA09g008460.3C | Cleavage site for pathogenic type III effector avirulence factor Avr                                                                | --                                                        |
| BraA09g010020.3C | Malic enzyme, NAD binding domain;; Malic enzyme, N-terminal domain                                                                  | NAD-dependent malic enzyme 1, mitochondrial               |
| BraA09g004930.3C | Domain of unknown function (DUF3444);; DnaJ domain                                                                                  | Chaperone protein dnaJ 49                                 |
| BraA09g007240.3C | Microtubule associated protein (MAP65/ASE1 family)                                                                                  | 65-kDa microtubule-associated protein 9                   |
| BraA09g007660.3C | --                                                                                                                                  | --                                                        |
| BraA09g007470.3C | --                                                                                                                                  | --                                                        |
| BraA09g009340.3C | SAP domain                                                                                                                          | Zinc finger CCCH domain-containing protein 62             |

|                  |                                                                                                                                                                                                                                                              |                                                           |
|------------------|--------------------------------------------------------------------------------------------------------------------------------------------------------------------------------------------------------------------------------------------------------------|-----------------------------------------------------------|
| BraA09g009710.3C | Protein kinase domain;; EF hand;; Protein tyrosine kinase; EF hand;; EF-hand domain;; EF-hand domain pair;; EF-hand domain pair;; Secreted protein acidic and rich in cysteine Ca binding region                                                             | Calcium-dependent protein kinase 28                       |
| BraA09g008100.3C | --                                                                                                                                                                                                                                                           | --                                                        |
| BraA09g007790.3C | Bromodomain;; Bromodomain extra-terminal - transcription regulation                                                                                                                                                                                          | Transcription factor GTE10                                |
| BraA09g008310.3C | Glycosyl hydrolase family 3 C-terminal domain;; Glycosyl hydrolase family 3 N terminal domain;; Fibronectin type III-like domain                                                                                                                             | Beta-D-xylydase 4                                         |
| BraA09g005720.3C | --                                                                                                                                                                                                                                                           | --                                                        |
| BraA09g007780.3C | Nucleoside diphosphate kinase                                                                                                                                                                                                                                | Nucleide diphphate kinase II, chloroplastic               |
| BraA09g008000.3C | Regulator of chromosome condensation (RCC1) repeat;; Regulator of chromosome condensation (RCC1) repeat                                                                                                                                                      | Ultraviolet-B receptor UVR8                               |
| BraA09g008140.3C | cAMP-regulated phosphoprotein/endosulfine conserved region                                                                                                                                                                                                   | --                                                        |
| BraA09g004990.3C | Amino-transferase class IV                                                                                                                                                                                                                                   | Branched-chain-amino-acid aminotransferase-like protein 2 |
| BraA09g006490.3C | Protein kinase domain;; EF hand;; Protein tyrosine kinase;; EF-hand domain;; EF-hand domain pair;; EF-hand domain pair;; EF hand;; EF-hand domain;; Cytoskeletal-regulatory complex EF hand;; Secreted protein acidic and rich in cysteine Ca binding region | Calcium-dependent protein kinase 12                       |
| BraA09g006680.3C | Protein of unknown function, DUF617                                                                                                                                                                                                                          | Protein MIZU-KUSSEI 1                                     |
| BraA09g009070.3C | Cytochrome P450;; EB1-like C-terminal motif;; Calponin homology (CH) domain                                                                                                                                                                                  | Cytochrome P450 81D1                                      |
| BraA09g004940.3C | --                                                                                                                                                                                                                                                           | --                                                        |
| BraA09g005680.3C | 16S rRNA methyltransferase RsmB/F;; Methyltransferase domain;; ubiE/COQ5 methyltransferase family                                                                                                                                                            | --                                                        |
| BraA09g008510.3C | Acyl-CoA oxidase;; Acyl-CoA dehydrogenase, middle domain;; Acyl-CoA dehydrogenase, C-terminal domain                                                                                                                                                         | Acyl-coenzyme A oxidase 2, peroxisomal                    |
| BraA09g006380.3C | Ribosomal protein L13e                                                                                                                                                                                                                                       | 60S ribomal protein L13-2                                 |
| BraA09g010080.3C | Peroxidase                                                                                                                                                                                                                                                   | Peroxidase 32                                             |
| BraA09g005040.3C | EF hand associated;; Ras family;; EF hand associated;; Seryl-tRNA synthetase N-terminal domain;; Ras of Complex, Roc, domain of DAPkinase;; 50S ribosome-binding GTPase;; EF-hand domain                                                                     | Mitochondrial Rho GTPase 1                                |
| BraA09g005640.3C | Alfin;; PHD-finger                                                                                                                                                                                                                                           | PHD finger protein ALFIN-LIKE 3                           |
| BraA09g008570.3C | Seed dormancy control;; bZIP transcription factor;; Basic region leucine zipper                                                                                                                                                                              | Transcription factor TGA1                                 |
| BraA09g008990.3C | --                                                                                                                                                                                                                                                           | --                                                        |

|                  |                                                                                                                                                          |                                                                  |
|------------------|----------------------------------------------------------------------------------------------------------------------------------------------------------|------------------------------------------------------------------|
| BraA09g007530.3C | RNA polymerase Rpb4                                                                                                                                      | --                                                               |
| BraA09g005350.3C | Calmodulin binding protein-like                                                                                                                          | Calmodulin-binding protein 60 G                                  |
| BraA09g009490.3C | Protein DA1;; LIM domain                                                                                                                                 | Protein DA1-related 3                                            |
| BraA09g006620.3C | GRAM domain                                                                                                                                              | Putative GEM-like protein 8                                      |
| BraA09g009740.3C | Rad17 cell cycle checkpoint protein;; ATPase family associated with various cellular activities (AAA)                                                    | Cell cycle checkpoint protein RAD17                              |
| BraA09g007510.3C | Domain of unknown function (DUF4228)                                                                                                                     | --                                                               |
| BraA09g005420.3C | U1 zinc finger;; Zinc finger C-x8-C-x5-C-x3-H type (and similar)                                                                                         | Zinc finger CCCH domain-containing protein 3                     |
| BraA09g005760.3C | Protein of unknown function (DUF1677)                                                                                                                    | --                                                               |
| BraA09g008860.3C | Domain of unknown function (DUF4228)                                                                                                                     | --                                                               |
| BraA09g008120.3C | --                                                                                                                                                       | --                                                               |
| BraA09g005290.3C | --                                                                                                                                                       | --                                                               |
| BraA09g006630.3C | Iron/manganese superoxide dismutases, C-terminal domain;; Iron/manganese superoxide dismutases, alpha-hairpin domain                                     | Superoxide dismutase [Fe] 3, chloroplastic                       |
| BraA09g009290.3C | Multicopper oxidase;; Multicopper oxidase;; Multicopper oxidase                                                                                          | L-ascorbate oxidase homolog                                      |
| BraA09g008650.3C | Cyclin, N-terminal domain;; Cyclin, C-terminal domain                                                                                                    | Cyclin-D4-1                                                      |
| BraA09g005450.3C | --                                                                                                                                                       | --                                                               |
| BraA09g008210.3C | 3,4-dihydroxy-2-butanone 4-phosphate synthase;; GTP cyclohydrolase II                                                                                    | Bifunctional riboflavin biynthesis protein RIBA 1, chloroplastic |
| BraA09g006930.3C | Response regulator receiver domain;; CCT motif                                                                                                           | Two-component response regulator-like APRR1                      |
| BraA09g004960.3C | Domain of unknown function (DUF4283);; Zinc knuckle                                                                                                      | Uncharacterized protein At4g02000                                |
| BraA09g007050.3C | AP2 domain                                                                                                                                               | Ethylene-responsive transcription factor ERF107                  |
| BraA09g003890.3C | KIX domain                                                                                                                                               | Probable mediator of RNA polymerase II transcription subunit 15c |
| BraA09g005580.3C | Plastocyanin-like domain                                                                                                                                 | Mavicyanin                                                       |
| BraA09g009660.3C | Peroxidase                                                                                                                                               | Peroxidase 72                                                    |
| BraA09g009260.3C | --                                                                                                                                                       | Molybdenum cofactor sulfurase                                    |
| BraA09g007010.3C | RhoGAP domain                                                                                                                                            | Uncharacterized Rho GTPase-activating protein At5g61530          |
| BraA09g010070.3C | DHHC palmitoyltransferase;; Ankyrin repeats (3 copies);; Ankyrin repeats (many copies);; Ankyrin repeat;; Ankyrin repeat;; Ankyrin repeats (many copies) | Probable protein S-acyltransferase 23                            |
| BraA09g006320.3C | Transferase family                                                                                                                                       | BAHD acyltransferase At5g47980                                   |
| BraA09g010140.3C | --                                                                                                                                                       | --                                                               |
| BraA09g010000.3C | Aminotransferase class-V                                                                                                                                 | Serine--glyoxylate aminotransferase                              |



|                  |                                                                                                                                    |                                                        |
|------------------|------------------------------------------------------------------------------------------------------------------------------------|--------------------------------------------------------|
| BraA09g009210.3C | Lipase (class 3);; Protein of unknown function (DUF2974)                                                                           | Phpholipase A1-Igamma2, chloroplastic                  |
| BraA09g007020.3C | Protein kinase domain;; Protein tyrosine kinase;; U-box domain;; Universal stress protein family                                   | U-box domain-containing protein 52                     |
| BraA09g008660.3C | 14-3-3 protein                                                                                                                     | 14-3-3-like protein GF14 kappa                         |
| BraA09g007990.3C | Glycosyl hydrolases family 31;; Galactose mutarotase-like                                                                          | Probable glucan 1,3-alpha-glucidase                    |
| BraA09g003830.3C | --                                                                                                                                 | Protein RIK                                            |
| BraA09g005610.3C | MATH domain                                                                                                                        | Ubiquitin carboxyl-terminal hydrolase 12               |
| BraA09g008090.3C | Transferase family                                                                                                                 | Uncharacterized acetyltransferase At3g50280            |
| BraA09g005030.3C | PPR repeat;; PPR repeat family;; Pentatricopeptide repeat domain                                                                   | Pentatricopeptide repeat-containing protein At5g27460  |
| BraA09g007430.3C | Sugar efflux transporter for intercellular exchange                                                                                | Bidirectional sugar transporter SWEET5                 |
| BraA09g007850.3C | --                                                                                                                                 | Mediator of RNA polymerase II transcription subunit 30 |
| BraA09g005970.3C | WD domain, G-beta repeat;; WD40 associated region in TFIID subunit, NTD2 domain;; Anaphase-promoting complex subunit 4 WD40 domain | Transcription initiation factor TFIID subunit 5        |
| BraA09g006450.3C | Ribosomal_S17 N-terminal;; Ribosomal protein S17                                                                                   | 40S ribosomal protein S11-3                            |
| BraA09g008880.3C | linker histone H1 and H5 family;; Myb-like DNA-binding domain;; Myb-like DNA-binding domain                                        | Telomere repeat-binding factor 2                       |
| BraA09g006780.3C | COBRA-like protein                                                                                                                 | Protein COBRA                                          |
| BraA09g005460.3C | Myb-like DNA-binding domain;; Myb-like DNA-binding domain                                                                          | Transcription factor MYB86                             |
| BraA09g007280.3C | No apical meristem (NAM) protein                                                                                                   | NAC domain-containing protein 101                      |
| BraA09g009310.3C | --                                                                                                                                 | Probable disease resistance protein At5g66890          |
| BraA09g008940.3C | --                                                                                                                                 | --                                                     |
| BraA09g006440.3C | Remorin, C-terminal region;; Remorin, N-terminal region                                                                            | Remorin                                                |
| BraA09g003910.3C | Cytochrome P450                                                                                                                    | Cytochrome P450 85A2                                   |
| BraA09g007860.3C | CBS domain;; PB1 domain                                                                                                            | CBS domain-containing protein CBSCBSPB1                |
| BraA09g005530.3C | Adenylate kinase;; AAA domain;; AAA domain;; AAA domain;; Thymidylate kinase                                                       | UMP-CMP kinase 3                                       |
| BraA09g008600.3C | Protein of unknown function, DUF617                                                                                                | Protein MIZU-KUSSEI 1                                  |
| BraA09g005810.3C | Ubiquitin-conjugating enzyme                                                                                                       | Protein PEROXIN-4                                      |
| BraA09g007670.3C | Histone deacetylase domain                                                                                                         | Histone deacetylase 6                                  |
| BraA09g008180.3C | CG-1 domain;; Ankyrin repeats (3 copies);; IQ calmodulin-binding motif;; Ankyrin repeats (many copies)                             | Calmodulin-binding transcription activator 2           |
| BraA09g005300.3C | Kinesin motor domain;; Microtubule binding;; Calponin homology (CH) domain                                                         | Kinesin-like protein KIN-14G                           |

|                  |                                                                                                                                                                 |                                                        |
|------------------|-----------------------------------------------------------------------------------------------------------------------------------------------------------------|--------------------------------------------------------|
| BraA09g006560.3C | con80 domain of Katanin                                                                                                                                         | Katanin p80 WD40 repeat-containing subunit B1 homolog  |
| BraA09g005670.3C | Papain family cysteine protease                                                                                                                                 | Thiol protease aleurain                                |
| BraA09g005200.3C | Folate receptor family                                                                                                                                          | --                                                     |
| BraA09g006350.3C | C2 domain                                                                                                                                                       | --                                                     |
| BraA09g007580.3C | --                                                                                                                                                              | --                                                     |
| BraA09g007130.3C | APO RNA-binding                                                                                                                                                 | APO protein 3, mitochondrial                           |
| BraA09g009800.3C | Bifunctional nuclease;; UvrB/uvrC motif                                                                                                                         | Bifunctional nuclease 2                                |
| BraA09g005840.3C | BURP domain                                                                                                                                                     | BURP domain protein RD22                               |
| BraA09g009630.3C | GATA zinc finger                                                                                                                                                | GATA transcription factor 5                            |
| BraA09g006890.3C | Ankyrin repeats (3 copies);; Ankyrin repeats (many copies);; Ankyrin repeat;; Ankyrin repeat;; Ankyrin repeats (many copies)                                    | Phytochrome-interacting ankyrin-repeat protein 2       |
| BraA09g008380.3C | --                                                                                                                                                              | --                                                     |
| BraA09g008320.3C | GDP-fucose protein O-fucosyltransferase                                                                                                                         | O-fucyltransferase 38                                  |
| BraA09g007680.3C | DEAD/DEAH box helicase;; Helicase conserved C-terminal domain                                                                                                   | DEAD-box ATP-dependent RNA helicase 30                 |
| BraA09g009580.3C | Cellulase (glycosyl hydrolase family 5)                                                                                                                         | Mannan endo-1,4-beta-mannidase 7                       |
| BraA09g007390.3C | HPP family                                                                                                                                                      | --                                                     |
| BraA09g005380.3C | tRNA synthetase class II core domain (G, H, P, S and T);; Anticodon binding domain;; TGS domain;; Threonyl and Alanine tRNA synthetase second additional domain | Threonine--tRNA ligase, mitochondrial 1                |
| BraA09g006870.3C | Ribosomal protein S19e                                                                                                                                          | 40S ribosomal protein S19-3                            |
| BraA09g005100.3C | Domain of unknown function (DUF1995)                                                                                                                            | --                                                     |
| BraA09g005590.3C | MATH domain                                                                                                                                                     | Ubiquitin carboxyl-terminal hydrolase 12               |
| BraA09g008050.3C | SRF-type transcription factor (DNA-binding and dimerisation domain)                                                                                             | Agamous-like MADS-box protein AGL61                    |
| BraA09g005600.3C | MATH domain                                                                                                                                                     | Ubiquitin carboxyl-terminal hydrolase 12               |
| BraA09g008410.3C | Cellulose synthase;; Zinc-binding RING-finger;; Glycosyl transferase family group 2                                                                             | Cellulose synthase A catalytic subunit 6 [UDP-forming] |
| BraA09g005070.3C | Mitochondrial carrier protein                                                                                                                                   | Peroxisomal adenine nucleotide carrier 2               |
| BraA09g008720.3C | Dof domain, zinc finger                                                                                                                                         | Dof zinc finger protein DOF5.7                         |
| BraA09g005260.3C | --                                                                                                                                                              | --                                                     |
| BraA09g009650.3C | Mitochondrial carrier protein                                                                                                                                   | Folate transporter 1, chloroplastic                    |
| BraA09g008540.3C | Aluminium induced protein                                                                                                                                       | --                                                     |
| BraA09g007000.3C | Zinc-binding dehydrogenase;; Zinc-binding dehydrogenase;; Alcohol                                                                                               | --                                                     |

|                  |                                                                                                                                                                               |                                                           |
|------------------|-------------------------------------------------------------------------------------------------------------------------------------------------------------------------------|-----------------------------------------------------------|
|                  | dehydrogenase GroES-like domain                                                                                                                                               |                                                           |
| BraA09g009240.3C | B3 DNA binding domain                                                                                                                                                         | Putative B3 domain-containing protein At5g66980           |
| BraA09g006770.3C | K-box region;; SRF-type transcription factor (DNA-binding and dimerisation domain)                                                                                            | Agamous-like MADS-box protein AGL8                        |
| BraA09g005430.3C | G-patch domain;; Zinc-finger double-stranded RNA-binding;; G-patch domain                                                                                                     | Septin and tuftelin-interacting protein 1 homolog 1       |
| BraA09g008290.3C | --                                                                                                                                                                            | Probable WRKY transcription factor 19                     |
| BraA09g006100.3C | 60s Acidic ribosomal protein                                                                                                                                                  | 60S acidic ribosomal protein P1                           |
| BraA09g005800.3C | Tesmin/TSO1-like CXC domain, cysteine-rich domain;; Alpha/beta hydrolase family;; Acetyl xylan esterase (AXE1);; Prolyl oligopeptidase family;; Dienelactone hydrolase family | Protein tesmin/TSO1-like CXC 7                            |
| BraA09g007720.3C | Anaphase-promoting complex subunit 15                                                                                                                                         | --                                                        |
| BraA09g006950.3C | --                                                                                                                                                                            | --                                                        |
| BraA09g005920.3C | Chloroplast import apparatus Tic20-like                                                                                                                                       | Protein TIC 20-II, chloroplastic                          |
| BraA09g004980.3C | --                                                                                                                                                                            | Branched-chain-amino-acid aminotransferase-like protein 1 |
| BraA09g005880.3C | AP2 domain                                                                                                                                                                    | Ethylene-responsive transcription factor SHINE 3          |
| BraA09g008420.3C | --                                                                                                                                                                            | Ethylene-responsive transcription factor ABR1             |
| BraA09g007890.3C | RecQ mediated genome instability protein;; Recq-mediated genome instability protein 1, C-terminal OB-fold                                                                     | RecQ-mediated genome instability protein 1                |
| BraA09g008340.3C | Plant invertase/pectin methylesterase inhibitor                                                                                                                               | Cell wall / vacuolar inhibitor of fructidase 2            |
| BraA09g008080.3C | Hyccin                                                                                                                                                                        | --                                                        |
| BraA09g007540.3C | --                                                                                                                                                                            | --                                                        |
| BraA09g007830.3C | Cytochrome P450                                                                                                                                                               | Cytochrome P450 94B1                                      |
| BraA09g005130.3C | C-terminus of histone H2A;; Core histone H2A/H2B/H3/H4                                                                                                                        | Probable histone H2A.5                                    |
| BraA09g009350.3C | --                                                                                                                                                                            | Precursor of CEP7                                         |
| BraA09g007380.3C | POT family                                                                                                                                                                    | Protein NRT1/ PTR FAMILY 2.11                             |
| BraA09g006190.3C | Glycosyl hydrolases family 17;; X8 domain                                                                                                                                     | Glucan endo-1,3-beta-glucidase                            |
| BraA09g006370.3C | Kinesin motor domain;; Microtubule binding;; Helix-hairpin-helix motif                                                                                                        | Kinesin-like protein KIN-10C                              |
| BraA09g008070.3C | Photosystem I reaction centre subunit N (PSAN or PSI-N)                                                                                                                       | Photystem I reaction center subunit N, chloroplastic      |
| BraA09g006290.3C | --                                                                                                                                                                            | --                                                        |
| BraA09g006710.3C | bZIP transcription factor;; Basic region leucine zipper;; bZIP Maf transcription factor                                                                                       | Basic leucine zipper 43                                   |
| BraA09g006510.3C | Got1/Sft2-like family                                                                                                                                                         | --                                                        |

|                  |                                                                                                                                                                                                                                                                                                                                                                 |                                                                              |
|------------------|-----------------------------------------------------------------------------------------------------------------------------------------------------------------------------------------------------------------------------------------------------------------------------------------------------------------------------------------------------------------|------------------------------------------------------------------------------|
| BraA09g009280.3C | Autophagy-related protein 101                                                                                                                                                                                                                                                                                                                                   | Autophagy-related protein 101                                                |
| BraA09g008010.3C | Calcineurin-like phosphoesterase                                                                                                                                                                                                                                                                                                                                | Serine/threonine-protein phosphatase 7                                       |
| BraA09g008800.3C | Aminotransferase class I and II                                                                                                                                                                                                                                                                                                                                 | 1-aminocyclopropane-1-carboxylate synthase 5                                 |
| BraA09g010120.3C | NPH3 family;; BTB/POZ domain                                                                                                                                                                                                                                                                                                                                    | BTB/POZ domain-containing protein NPY2                                       |
| BraA09g008280.3C | No apical meristem (NAM) protein                                                                                                                                                                                                                                                                                                                                | NAC domain-containing protein 104                                            |
| BraA09g009610.3C | --                                                                                                                                                                                                                                                                                                                                                              | --                                                                           |
| BraA09g007750.3C | Tetratricopeptide repeat;; Tetratricopeptide repeat;; Tetratricopeptide repeat;;<br>Tetratricopeptide repeat;; Tetratricopeptide repeat;; TPR repeat;;<br>Tetratricopeptide repeat;; Tetratricopeptide repeat;; Tetratricopeptide repeat;;<br>Tetratricopeptide repeat;; Tetratricopeptide repeat;; Tetratricopeptide repeat                                    | Probable UDP-N-acetylglucamine--peptide<br>N-acetylglucaminyltransferase SEC |
| BraA09g008620.3C | MatE                                                                                                                                                                                                                                                                                                                                                            | Protein DETOXIFICATION 27                                                    |
| BraA09g005400.3C | --                                                                                                                                                                                                                                                                                                                                                              | Nuclear envelope-associated protein 2                                        |
| BraA09g006750.3C | Protein kinase domain;; Protein tyrosine kinase;; D-mannose binding lectin;;<br>PAN-like domain                                                                                                                                                                                                                                                                 | G-type lectin S-receptor-like serine/threonine-protein kinase<br>RLK1        |
| BraA09g009430.3C | --                                                                                                                                                                                                                                                                                                                                                              | --                                                                           |
| BraA09g007090.3C | Inositol polyphosphate kinase                                                                                                                                                                                                                                                                                                                                   | Inositol polyphosphate multikinase beta                                      |
| BraA09g005090.3C | Kinesin motor domain;; Microtubule binding                                                                                                                                                                                                                                                                                                                      | Kinesin-like protein KIN-14S                                                 |
| BraA09g007400.3C | Protein of unknown function (DUF1645)                                                                                                                                                                                                                                                                                                                           | --                                                                           |
| BraA09g007730.3C | Calcineurin-like phosphoesterase                                                                                                                                                                                                                                                                                                                                | Probable inactive purple acid phosphatase 29                                 |
| BraA09g008440.3C | WRKY DNA -binding domain                                                                                                                                                                                                                                                                                                                                        | Probable WRKY transcription factor 51                                        |
| BraA09g005250.3C | --                                                                                                                                                                                                                                                                                                                                                              | --                                                                           |
| BraA09g008500.3C | Nucleotide-sugar transporter;; Purine nucleobase transmembrane transport<br>PPR repeat family;; PPR repeat;; PPR repeat;; Pentatricopeptide repeat domain;;<br>Pentacotriptide-repeat region of PRORP;; Tetratricopeptide repeat;;<br>Tetratricopeptide repeat;; Tetratricopeptide repeat;; Evolutionarily conserved<br>signalling intermediate in Toll pathway | CMP-sialic acid transporter 5                                                |
| BraA09g005820.3C | Flavin-binding monooxygenase-like;; Pyridine nucleotide-disulphide<br>oxidoreductase;; L-lysine 6-monooxygenase (NADPH-requiring);; Pyridine<br>nucleotide-disulphide oxidoreductase;; FAD binding domain;; NAD(P)-binding<br>Rossmann-like domain;; Pyridine nucleotide-disulphide oxidoreductase                                                              | Pentatricopeptide repeat-containing protein At5g25630                        |
| BraA09g005830.3C | SNF2 family N-terminal domain;; U1 small nuclear ribonucleoprotein of 70kDa<br>MW N terminal;; Helicase conserved C-terminal domain;; RNA recognition<br>motif. (a.k.a. RRM, RBD, or RNP domain);; Type III restriction enzyme, res                                                                                                                             | Indole-3-pyruvate monooxygenase YUCCA6                                       |
| BraA09g009400.3C |                                                                                                                                                                                                                                                                                                                                                                 | ATP-dependent DNA helicase DDM1                                              |

|                  |                                                                                                                                           |                                                                            |
|------------------|-------------------------------------------------------------------------------------------------------------------------------------------|----------------------------------------------------------------------------|
|                  | subunit                                                                                                                                   |                                                                            |
| BraA09g007120.3C | Domain of unknown function DUF220                                                                                                         | --                                                                         |
| BraA09g007550.3C | Plant organelle RNA recognition domain                                                                                                    | Protein WHAT&ap;S THIS FACTOR 1 homolog                                    |
| BraA09g010130.3C | Zn-finger in ubiquitin-hydrolases and other protein                                                                                       | --                                                                         |
| BraA09g009940.3C | --                                                                                                                                        | --                                                                         |
| BraA09g010110.3C | Helix-loop-helix DNA-binding domain                                                                                                       | Transcription factor bHLH84                                                |
| BraA09g007210.3C | DEAD/DEAH box helicase;; GUCT (NUC152) domain;; Helicase conserved C-terminal domain;; Type III restriction enzyme, res subunit           | DEAD-box ATP-dependent RNA helicase 7                                      |
| BraA09g003860.3C | Transferase family                                                                                                                        | BAHD acyltransferase At3g29680                                             |
| BraA09g005470.3C | Pectinacetylesterase                                                                                                                      | Pectin acetylesterase 10                                                   |
| BraA09g009640.3C | Glutaredoxin                                                                                                                              | Glutaredoxin-C3                                                            |
| BraA09g009040.3C | --                                                                                                                                        | --                                                                         |
| BraA09g006900.3C | Leucine Rich repeats (2 copies);; Leucine rich repeat;; Leucine Rich Repeat;; Leucine Rich repeat;; Leucine rich repeat N-terminal domain | Leucine-rich repeat receptor protein kinase MSP1                           |
| BraA09g005930.3C | --                                                                                                                                        | Hydroxyproline O-arabinytransferase 1                                      |
| BraA09g007910.3C | Aminotransferase class-III                                                                                                                | Glutamate-1-semialdehyde 2,1-aminomutase, chloroplastic                    |
| BraA09g009860.3C | Kinesin motor domain;; Microtubule binding;; MyTH4 domain;; FERM central domain;; FERM N-terminal domain                                  | Kinesin-like protein KIN-14E                                               |
| BraA09g007900.3C | DEK C terminal domain                                                                                                                     | --                                                                         |
| BraA09g008810.3C | --                                                                                                                                        | Uncharacterized protein At3g49720                                          |
| BraA09g006590.3C | Leucine rich repeat;; Leucine Rich repeats (2 copies);; Leucine Rich Repeat;; Leucine rich repeat N-terminal domain;; Leucine Rich repeat | Leucine-rich repeat receptor-like protein kinase PXC2                      |
| BraA09g009390.3C | FAD binding domain;; Fumarate reductase flavoprotein C-term                                                                               | Succinate dehydrogenase [ubiquinone] flavoprotein subunit 1, mitochondrial |
| BraA09g008360.3C | Ribosomal protein L17                                                                                                                     | 50S ribomal protein L17, chloroplastic                                     |
| BraA09g009770.3C | 2OG-Fe(II) oxygenase superfamily;; 2OG-Fe(II) oxygenase superfamily                                                                       | Probable prolyl 4-hydroxylase 10                                           |
| BraA09g007630.3C | Ribosomal protein S19                                                                                                                     | 40S ribomal protein S15-6                                                  |
| BraA09g006240.3C | Sigma-70 region 3;; Sigma-70, region 4;; Sigma-70 region 2                                                                                | RNA polymerase sigma factor sigE, chloroplastic/mitochondrial              |
| BraA09g008610.3C | Core histone H2A/H2B/H3/H4                                                                                                                | Histone H3.2                                                               |
| BraA09g009790.3C | --                                                                                                                                        | --                                                                         |
| BraA09g007330.3C | Helix-loop-helix DNA-binding domain                                                                                                       | Transcription factor bHLH79                                                |

|                  |                                                                                                                                                                                                        |                                                                               |
|------------------|--------------------------------------------------------------------------------------------------------------------------------------------------------------------------------------------------------|-------------------------------------------------------------------------------|
| BraA09g008790.3C | Myb-like DNA-binding domain;; Myb-like DNA-binding domain                                                                                                                                              | Transcription factor RAX3                                                     |
| BraA09g006570.3C | --                                                                                                                                                                                                     | GPI-anchored protein LLG1                                                     |
| BraA09g006000.3C | Protein of unknown function (DUF1336)                                                                                                                                                                  | Protein ENHANCED DISEASE RESISTANCE 2-like                                    |
| BraA09g007030.3C | Protein kinase domain;; Protein tyrosine kinase;; Universal stress protein family                                                                                                                      | U-box domain-containing protein 52                                            |
| BraA09g009870.3C | Hydrophobic seed protein;; Probable lipid transfer                                                                                                                                                     | pEARLII-like lipid transfer protein 1                                         |
| BraA09g008870.3C | ETC complex I subunit conserved region                                                                                                                                                                 | NADH dehydrogenase [ubiquinone] iron-sulfur protein 4, mitochondrial          |
| BraA09g005360.3C | Domain of unknown function (DUF4378);; DUF761-associated sequence motif                                                                                                                                | --                                                                            |
| BraA09g007480.3C | MuDR family transposase;; SWIM zinc finger                                                                                                                                                             | --                                                                            |
| BraA09g005510.3C | DEAD/DEAH box helicase;; Helicase conserved C-terminal domain;; GUCT (NUC152) domain;; Type III restriction enzyme, res subunit;; Zinc knuckle                                                         | DEAD-box ATP-dependent RNA helicase 3, chloroplastic                          |
| BraA09g006810.3C | Replication factor-A C terminal domain;; Replication factor-A protein 1, N-terminal domain;; Replication protein A OB domain;; OB-fold nucleic acid binding domain;; Domain of unknown function DUF223 | Replication protein A 70 kDa DNA-binding subunit D                            |
| BraA09g008770.3C | Aminotransferase class-V;; Beta-eliminating lyase;; DegT/DnrJ/EryC1/StrS aminotransferase family                                                                                                       | Cysteine desulfurase, mitochondrial                                           |
| BraA09g009950.3C | Serine carboxypeptidase                                                                                                                                                                                | Serine carboxypeptidase-like 42                                               |
| BraA09g005020.3C | GHMP kinases N terminal domain;; GHMP kinases C terminal                                                                                                                                               | Mevalonate kinase                                                             |
| BraA09g006140.3C | RNA recognition motif. (a.k.a. RRM, RBD, or RNP domain)                                                                                                                                                | Polyadenylate-binding protein-interacting protein 13                          |
| BraA09g007250.3C | Domain of unknown function (DUF296)                                                                                                                                                                    | AT-hook motif nuclear-localized protein 6                                     |
| BraA09g006600.3C | --                                                                                                                                                                                                     | Probable glucose-1-phosphate adenylyltransferase large subunit, chloroplastic |
| BraA09g006090.3C | No apical meristem (NAM) protein                                                                                                                                                                       | NAC domain-containing protein 91                                              |
| BraA09g004950.3C | Eukaryotic glutathione synthase, ATP binding domain;; Eukaryotic glutathione synthase                                                                                                                  | Glutathione synthetase, chloroplastic                                         |
| BraA09g007950.3C | Pyruvate kinase, barrel domain;; Pyruvate kinase, alpha/beta domain                                                                                                                                    | Pyruvate kinase, cytosolic isozyme                                            |
| BraA09g005340.3C | GATA zinc finger                                                                                                                                                                                       | GATA transcription factor 23                                                  |
| BraA09g007500.3C | Permease family                                                                                                                                                                                        | Nucleobase-ascorbate transporter 6                                            |
| BraA09g009510.3C | Cysteine-rich secretory protein family                                                                                                                                                                 | STS14 protein                                                                 |
| BraA09g007820.3C | FBD                                                                                                                                                                                                    | FBD-associated F-box protein At4g10400                                        |
| BraA09g006500.3C | Cleft lip and palate transmembrane protein 1 (CLPTM1);; PQ loop repeat                                                                                                                                 | --                                                                            |
| BraA09g006150.3C | RNA recognition motif. (a.k.a. RRM, RBD, or RNP domain)                                                                                                                                                | Polyadenylate-binding protein-interacting protein 13                          |

|                  |                                                                                                |                                                      |
|------------------|------------------------------------------------------------------------------------------------|------------------------------------------------------|
| BraA09g007940.3C | Alcohol dehydrogenase GroES-like domain                                                        | Probable mannitol dehydrogenase                      |
| BraA09g007140.3C | Auxin response factor;; B3 DNA binding domain;; AUX/IAA family                                 | Auxin response factor 2                              |
| BraA09g008960.3C | Lateral organ boundaries (LOB) domain                                                          | LOB domain-containing protein 37                     |
| BraA09g005790.3C | AP2 domain                                                                                     | Ethylene-responsive transcription factor TINY        |
| BraA09g006220.3C | Phosphatidylinositol 3- and 4-kinase                                                           | Phphatidylnitol 4-kinase gamma 3                     |
| BraA09g003820.3C | --                                                                                             | --                                                   |
| BraA09g009690.3C | --                                                                                             | --                                                   |
| BraA09g005550.3C | Pyruvate phosphate dikinase, PEP/pyruvate binding domain;; Starch binding domain               | Phphoglucan, water dikinase, chloroplastic           |
| BraA09g005160.3C | --                                                                                             | --                                                   |
| BraA09g005660.3C | --                                                                                             | --                                                   |
| BraA09g006390.3C | S-layer homology domain                                                                        | --                                                   |
| BraA09g003920.3C | Myb-like DNA-binding domain;; Myb-like DNA-binding domain                                      | Transcription factor MYB62                           |
| BraA09g008640.3C | ZF-HD protein dimerisation region                                                              | Zinc-finger homeodomain protein 1                    |
| BraA09g006940.3C | Exonuclease                                                                                    | Protein NEN2                                         |
| BraA09g008690.3C | Protein tyrosine kinase;; U-box domain;; Protein kinase domain                                 | Putative U-box domain-containing protein 50          |
| BraA09g009090.3C | Dihydrouridine synthase (Dus);; Histidine biosynthesis protein;; Dihydroorotate dehydrogenase  | tRNA-dihydrouridine(47) synthase [NAD(P)(+)]-like    |
| BraA09g007700.3C | Taurine catabolism dioxygenase TauD, TfdA family                                               | Clavamate synthase-like protein At3g21360            |
| BraA09g005140.3C | Ribosomal protein S21e                                                                         | 40S ribomal protein S21-2                            |
| BraA09g009550.3C | Domain of unknown function DUF223;; Replication protein A OB domain                            | --                                                   |
| BraA09g006160.3C | RNA recognition motif. (a.k.a. RRM, RBD, or RNP domain)                                        | Polyadenylate-binding protein-interacting protein 13 |
| BraA09g008300.3C | CorA-like Mg <sup>2+</sup> transporter protein                                                 | Magnesium transporter MRS2-2                         |
| BraA09g008020.3C | Histidinol dehydrogenase                                                                       | Histidinol dehydrogenase, chloroplastic              |
| BraA09g009920.3C | Monogalactosyldiacylglycerol (MGDG) synthase;; Glycosyltransferase family 28 C-terminal domain | Monogalactyldiacylglycerol synthase 3, chloroplastic |
| BraA09g009440.3C | Homeobox domain;; Homeobox KN domain                                                           | Homeobox-leucine zipper protein ATHB-53              |
| BraA09g006610.3C | Protein of unknown function (DUF789)                                                           | --                                                   |
| BraA09g005900.3C | --                                                                                             | --                                                   |
| BraA09g009530.3C | Manganese-stabilising protein / photosystem II polypeptide                                     | Oxygen-evolving enhancer protein 1-1, chloroplastic  |
| BraA09g006200.3C | EF hand;; EF-hand domain;; EF-hand domain pair;; EF hand;; EF-hand domain pair                 | Calcineurin B-like protein 4                         |

|                  |                                                                                                                                                                                                                                                                   |                                                                                      |
|------------------|-------------------------------------------------------------------------------------------------------------------------------------------------------------------------------------------------------------------------------------------------------------------|--------------------------------------------------------------------------------------|
| BraA09g008930.3C | C2H2-type zinc finger;; C2H2-type zinc finger;; Zinc-finger double-stranded RNA-binding                                                                                                                                                                           | Zinc finger protein AZF1                                                             |
| BraA09g009700.3C | --                                                                                                                                                                                                                                                                | --                                                                                   |
| BraA09g009970.3C | Glutathione S-transferase, N-terminal domain;; Glutathione S-transferase, C-terminal domain;; Glutathione S-transferase, N-terminal domain;; Glutathione S-transferase, N-terminal domain;; Glutathione S-transferase, C-terminal domain                          | Glutathione S-transferase F14                                                        |
| BraA09g006020.3C | --                                                                                                                                                                                                                                                                | --                                                                                   |
| BraA09g006360.3C | --                                                                                                                                                                                                                                                                | --                                                                                   |
| BraA09g006050.3C | --                                                                                                                                                                                                                                                                | tRNA (guanine-N(7)-)-methyltransferase                                               |
| BraA09g009150.3C | Transferase family                                                                                                                                                                                                                                                | Protein ENHANCED PSEUDOMONAS SUSCEPTILITY 1                                          |
| BraA09g006330.3C | Transferase family                                                                                                                                                                                                                                                | BAHD acyltransferase At5g47980                                                       |
| BraA09g010010.3C | SNF2 family N-terminal domain;; Chromo (CHRromatin Organisation MODifier) domain;; Helicase conserved C-terminal domain;; Domain of unknown function (DUF4208);; Class II histone deacetylase complex subunits 2 and 3;; Type III restriction enzyme, res subunit | Protein CHROMATIN REMODELING 5                                                       |
| BraA09g008040.3C | Small VCP/p97-interacting protein                                                                                                                                                                                                                                 | --                                                                                   |
| BraA09g006260.3C | Protein kinase domain;; Protein tyrosine kinase;; Leucine rich repeat;; Leucine Rich repeats (2 copies);; Leucine rich repeat N-terminal domain                                                                                                                   | Inactive leucine-rich repeat receptor-like serine/threonine-protein kinase At5g24100 |
| BraA09g006030.3C | --                                                                                                                                                                                                                                                                | Flowering-promoting factor 1                                                         |
| BraA09g007080.3C | --                                                                                                                                                                                                                                                                | Protein ORANGE, chloroplastic                                                        |
| BraA09g008970.3C | Transcriptional regulator of RNA polII, SAGA, subunit                                                                                                                                                                                                             | --                                                                                   |
| BraA09g006230.3C | Squalene epoxidase;; FAD binding domain;; FAD dependent oxidoreductase;; FAD binding domain;; NAD(P)-binding Rossmann-like domain;; Glucose inhibited division protein A                                                                                          | Squalene monooxygenase 1,1                                                           |
| BraA09g005560.3C | --                                                                                                                                                                                                                                                                | T-complex protein 1 subunit gamma                                                    |
| BraA09g008710.3C | UDP-glucuronosyl and UDP-glucosyl transferase                                                                                                                                                                                                                     | UDP-glycyltransferase 91B1                                                           |
| BraA09g009560.3C | --                                                                                                                                                                                                                                                                | --                                                                                   |
| BraA09g008760.3C | Protein kinase domain;; Protein tyrosine kinase;; Leucine rich repeat;; Leucine Rich repeats (2 copies);; Leucine Rich Repeat;; Leucine rich repeat N-terminal domain                                                                                             | LRR receptor-like serine/threonine-protein kinase HSL2                               |
| BraA09g009000.3C | Protein of unknown function (DUF1230)                                                                                                                                                                                                                             | Protein CONSERVED IN THE GREEN LINEAGE AND DIATOMS 27, chloroplastic                 |
| BraA09g006690.3C | Histone-like transcription factor (CBF/NF-Y) and archaeal histone                                                                                                                                                                                                 | Protein Dr1 homolog                                                                  |



|                  |                                                                                                                                                                                                                                                                        |                                                                        |
|------------------|------------------------------------------------------------------------------------------------------------------------------------------------------------------------------------------------------------------------------------------------------------------------|------------------------------------------------------------------------|
| BraA09g003850.3C | Transferase family                                                                                                                                                                                                                                                     | Malonyl-CoA:anthocyanidin<br>5-O-glucide-6&ap&ap;-O-malonyltransferase |
| BraA09g007230.3C | Cell cycle regulated microtubule associated protein                                                                                                                                                                                                                    | --                                                                     |
| BraA09g006740.3C | Myb-like DNA-binding domain;; Myb-like DNA-binding domain                                                                                                                                                                                                              | Transcription factor MYB34                                             |
| BraA09g006060.3C | Coatomer WD associated region;; WD domain, G-beta repeat                                                                                                                                                                                                               | --                                                                     |
| BraA09g007970.3C | --                                                                                                                                                                                                                                                                     | Protein KOKOPELLI                                                      |
| BraA09g009570.3C | 50S ribosome-binding GTPase;; KH domain;; Ferrous iron transport protein B;;<br>RsgA GTPase;; Dynamin family;; Conserved hypothetical ATP binding protein                                                                                                              | GTPase ERA-like, chloroplastic                                         |
| BraA09g005190.3C | Ribosomal L18 of archaea, bacteria, mitoch. and chloroplast                                                                                                                                                                                                            | --                                                                     |
| BraA09g009360.3C | --                                                                                                                                                                                                                                                                     | Precursor of CEP6                                                      |
| BraA09g009590.3C | PPR repeat family;; PPR repeat;; PPR repeat;; Pentatricopeptide repeat domain;;<br>Pentacotriptide-repeat region of PRORP;; Tetratricopeptide repeat;;<br>Tetratricopeptide repeat;; Tetratricopeptide repeat;; Tetratricopeptide repeat;;<br>Tetratricopeptide repeat | Putative pentatricopeptide repeat-containing protein At3g47840         |
| BraA09g009220.3C | FAD binding domain;; FHA domain;; NAD(P)-binding Rossmann-like domain;;<br>FAD binding domain                                                                                                                                                                          | Zeaxanthin epoxidase, chloroplastic                                    |
| BraA09g009250.3C | Prolyl oligopeptidase, N-terminal beta-propeller domain;; Prolyl oligopeptidase<br>family;; Secretory lipase                                                                                                                                                           | --                                                                     |
| BraA09g009830.3C | RNA recognition motif. (a.k.a. RRM, RBD, or RNP domain)                                                                                                                                                                                                                | --                                                                     |
| BraA09g009230.3C | RWP-RK domain                                                                                                                                                                                                                                                          | Protein RKD3                                                           |
| BraA09g006250.3C | WRKY DNA -binding domain                                                                                                                                                                                                                                               | Probable WRKY transcription factor 30                                  |
| BraA09g009420.3C | Protein tyrosine kinase;; Protein kinase domain;; Kinase-like                                                                                                                                                                                                          | Serine/threonine-protein kinase HT1                                    |
| BraA09g006860.3C | Leo1-like protein                                                                                                                                                                                                                                                      | Protein LEO1 homolog                                                   |
| BraA09g009520.3C | Domain of unknown function (DUF4228)                                                                                                                                                                                                                                   | --                                                                     |
| BraA09g008190.3C | Splicing factor 3B subunit 1;; HEAT repeat;; HEAT repeats;; HEAT-like repeat;;<br>non-SMC mitotic condensation complex subunit 1;; Vacuolar 14 Fab1-binding<br>region                                                                                                  | --                                                                     |
| BraA09g007110.3C | Calreticulin family                                                                                                                                                                                                                                                    | Calnexin homolog 1                                                     |
| BraA09g006790.3C | COBRA-like protein                                                                                                                                                                                                                                                     | COBRA-like protein 5                                                   |
| BraA09g005390.3C | IGR protein motif                                                                                                                                                                                                                                                      | --                                                                     |
| BraA09g008670.3C | Domain of unknown function (DUF4283);; Zinc knuckle                                                                                                                                                                                                                    | Uncharacterized protein At4g02000                                      |
| BraA09g005170.3C | LSM domain                                                                                                                                                                                                                                                             | Sm-like protein LSM4                                                   |

|                  |                                                                                    |                                                                  |
|------------------|------------------------------------------------------------------------------------|------------------------------------------------------------------|
| BraA09g009270.3C | Dof domain, zinc finger                                                            | Dof zinc finger protein DOF5.8                                   |
| BraA09g007150.3C | Hsp70 protein;; MreB/Mbl protein;; NAD-specific glutamate dehydrogenase            | Probable mediator of RNA polymerase II transcription subunit 37e |
| BraA09g007520.3C | Dof domain, zinc finger                                                            | Dof zinc finger protein DOF5.6                                   |
| BraA09g005940.3C | --                                                                                 | --                                                               |
| BraA09g008740.3C | AUX/IAA family                                                                     | Auxin-responsive protein IAA9                                    |
| BraA09g007070.3C | --                                                                                 | Spliceosome-associated protein 130 B                             |
| BraA09g006840.3C | Histone deacetylase domain                                                         | Histone deacetylase 5                                            |
| BraA09g007260.3C | Protein of unknown function (DUF1442)                                              | --                                                               |
| BraA09g005630.3C | ChaC-like protein                                                                  | Gamma-glutamylcyclotransferase 2-1                               |
| BraA09g008590.3C | Protein of unknown function (DUF740)                                               | --                                                               |
| BraA09g007170.3C | SRF-type transcription factor (DNA-binding and dimerisation domain);; K-box region | MADS-box protein AGL42                                           |
| BraA09g008820.3C | Leucine rich repeat;; Leucine Rich repeats (2 copies);; Leucine Rich Repeat        | Inactive LRR receptor-like serine/threonine-protein kinase BIR2  |
| BraA09g008270.3C | --                                                                                 | --                                                               |
| BraA09g006340.3C | --                                                                                 | --                                                               |
| BraA09g009370.3C | --                                                                                 | --                                                               |
| BraA09g006470.3C | RNA polymerase Rpc34 subunit                                                       | --                                                               |
| BraA09g008730.3C | --                                                                                 | Uncharacterized protein At5g65660                                |
| BraA09g007560.3C | Glutaredoxin                                                                       | Glutaredoxin-C1                                                  |
| BraA09g008550.3C | --                                                                                 | --                                                               |
| BraA09g005650.3C | Mitochondrial carrier protein                                                      | Folate transporter 1, chloroplastic                              |
| BraA09g009820.3C | SacI homology domain                                                               | Phosphoinositide phosphatase SAC6                                |
| BraA09g004970.3C | Tim44-like domain                                                                  | --                                                               |
| BraA09g006550.3C | --                                                                                 | --                                                               |
| BraA09g006120.3C | Response regulator receiver domain;; CCT motif                                     | Two-component response regulator-like APRR5                      |
| BraA09g006720.3C | Dof domain, zinc finger                                                            | Dof zinc finger protein DOF5.4                                   |
| BraA09g009990.3C | C2 domain                                                                          | BON1-associated protein 2                                        |
| BraA09g009030.3C | Subtilase family;; Peptidase inhibitor I9;; PA domain                              | Subtilisin-like protease SBT1.7                                  |
| BraA09g007960.3C | SWIB/MDM2 domain;; Plus-3 domain                                                   | Uncharacterized protein At5g08430                                |
| BraA09g007290.3C | Myb-like DNA-binding domain;; Myb-like DNA-binding domain                          | Transcription factor MYB94                                       |

|                  |                                                                                                                                                             |                                                                      |
|------------------|-------------------------------------------------------------------------------------------------------------------------------------------------------------|----------------------------------------------------------------------|
| BraA09g006910.3C | Apoptosis antagonizing transcription factor;; Apoptosis-antagonizing transcription factor, C-terminal                                                       | --                                                                   |
| BraA09g007640.3C | Cupin-like domain;; JmjC domain, hydroxylase                                                                                                                | F-box protein At1g78280                                              |
| BraA09g007880.3C | Heavy-metal-associated domain                                                                                                                               | Heavy metal-associated isoprenylated plant protein 7                 |
| BraA09g008230.3C | FKBP-type peptidyl-prolyl cis-trans isomerase                                                                                                               | Peptidyl-prolyl cis-trans isomerase FKBP12                           |
| BraA09g009110.3C | NB-ARC domain                                                                                                                                               | Disease resistance protein RPP13                                     |
| BraA09g009670.3C | Dehydrin                                                                                                                                                    | Dehydrin Rab18                                                       |
| BraA09g009330.3C | Ribosomal protein TL5, C-terminal domain                                                                                                                    | --                                                                   |
| BraA09g007460.3C | Domain of unknown function (DUF1985);; Ulp1 protease family, C-terminal catalytic domain                                                                    | --                                                                   |
| BraA09g005540.3C | Response regulator receiver domain                                                                                                                          | Two-component response regulator ARR22                               |
| BraA09g010060.3C | Aldehyde dehydrogenase family                                                                                                                               | Methylmalonate-semialdehyde dehydrogenase [acylating], mitochondrial |
| BraA09g007270.3C | Plant invertase/pectin methylesterase inhibitor                                                                                                             | 21 kDa protein                                                       |
| BraA09g006540.3C | alpha/beta hydrolase fold;; Carboxylesterase family                                                                                                         | Probable carboxylesterase 18                                         |
| BraA09g005180.3C | Ribosomal L22e protein family                                                                                                                               | 60S ribosomal protein L22-2                                          |
| BraA09g007650.3C | Lateral organ boundaries (LOB) domain                                                                                                                       | Protein LATERAL ORGAN BOUNDARIES                                     |
| BraA09g009980.3C | Glycosyltransferase family 17                                                                                                                               | --                                                                   |
| BraA09g008850.3C | --                                                                                                                                                          | --                                                                   |
| BraA09g007690.3C | Translin family                                                                                                                                             | Mitochondrial import inner membrane translocase subunit TIM14-3      |
| BraA09g007420.3C | Peroxisomal membrane anchor protein (Pex14p) conserved region                                                                                               | Peroxisomal membrane protein PEX14                                   |
| BraA09g008980.3C | Peroxidase                                                                                                                                                  | Peroxidase 73                                                        |
| BraA09g005890.3C | Leucine Rich repeat;; F-box domain;; F-box-like;; Leucine Rich Repeat                                                                                       | EIN3-binding F-box protein 2                                         |
| BraA09g006920.3C | Protein tyrosine kinase;; Protein kinase domain;; Carbohydrate-binding protein of the ER;; Di-glucose binding within endoplasmic reticulum                  | Probable receptor-like protein kinase At5g61350                      |
| BraA09g007760.3C | Protein of unknown function (DUF410)                                                                                                                        | --                                                                   |
| BraA09g006980.3C | Myb-like DNA-binding domain;; Myb-like DNA-binding domain                                                                                                   | Transcription factor MYB28                                           |
| BraA09g005570.3C | Sugar (and other) transporter;; Major Facilitator Superfamily                                                                                               | Sugar transport protein 13                                           |
| BraA09g006180.3C | Glucosamine-6-phosphate isomerases/6-phosphogluconolactonase                                                                                                | Probable 6-phosphogluconolactonase 5, chloroplastic                  |
| BraA09g008890.3C | ADP-ribosylation factor family;; Ras family;; Ras of Complex, Roc, domain of DAPkinase;; Gtr1/RagA G protein conserved region;; Signal recognition particle | ADP-ribylation factor-like protein 8b                                |

|                  |                                                                                                                              |                                                                              |
|------------------|------------------------------------------------------------------------------------------------------------------------------|------------------------------------------------------------------------------|
|                  | receptor beta subunit;; 50S ribosome-binding GTPase                                                                          |                                                                              |
| BraA09g005520.3C | --                                                                                                                           | --                                                                           |
| BraA09g009190.3C | --                                                                                                                           | --                                                                           |
| BraA09g007160.3C | --                                                                                                                           | --                                                                           |
| BraA09g006760.3C | D-mannose binding lectin                                                                                                     | G-type lectin S-receptor-like serine/threonine-protein kinase RLK1           |
| BraA09g008920.3C | Eukaryotic porin                                                                                                             | Mitochondrial outer membrane protein porin 2                                 |
| BraA09g009080.3C | --                                                                                                                           | Probable beta-1,4-xylyltransferase IRX14H                                    |
| BraA09g008900.3C | --                                                                                                                           | --                                                                           |
| BraA09g005730.3C | Plant self-incompatibility protein S1                                                                                        | --                                                                           |
| BraA09g008030.3C | PHD-finger;; Acetyltransferase (GNAT) domain;; Acetyltransferase (GNAT) family                                               | Increased DNA methylation 1                                                  |
| BraA09g005780.3C | Exostosin family                                                                                                             | Probable glycytransferase At5g03795                                          |
| BraA09g008400.3C | Prolamin-like                                                                                                                | Egg cell-secreted protein 1.5                                                |
| BraA09g006640.3C | Dihydroorotate dehydrogenase                                                                                                 | Dihydroorotate dehydrogenase (quinone), mitochondrial                        |
| BraA09g007590.3C | --                                                                                                                           | --                                                                           |
| BraA09g007200.3C | DUF761-associated sequence motif                                                                                             | --                                                                           |
| BraA09g008430.3C | Glycosyl hydrolases family 17;; X8 domain                                                                                    | Glucan endo-1,3-beta-glucidase 8                                             |
| BraA09g009140.3C | OTU-like cysteine protease;; SEC-C motif                                                                                     | --                                                                           |
| BraA09g009780.3C | Ankyrin repeats (3 copies);; Ankyrin repeats (many copies);; Ankyrin repeats (many copies);; Ankyrin repeat;; Ankyrin repeat | Ankyrin repeat domain-containing protein, chloroplastic                      |
| BraA09g005000.3C | --                                                                                                                           | --                                                                           |
| BraA09g007610.3C | --                                                                                                                           | --                                                                           |
| BraA09g009880.3C | Zinc knuckle                                                                                                                 | --                                                                           |
| BraA09g007920.3C | non-haem dioxygenase in morphine synthesis N-terminal;; 2OG-Fe(II) oxygenase superfamily                                     | Flavonol synthase/flavanone 3-hydroxylase                                    |
| BraA09g007810.3C | Protein tyrosine kinase;; Protein kinase domain;; Leucine rich repeat;; Leucine rich repeat N-terminal domain                | Probable inactive leucine-rich repeat receptor-like protein kinase At3g03770 |
| BraA09g009450.3C | UDP-glucuronosyl and UDP-glucosyl transferase                                                                                | UDP-glycytransferase 72E3                                                    |
| BraA09g007740.3C | Pectate lyase;; Right handed beta helix region                                                                               | Probable pectate lyase 22                                                    |
| BraA09g008840.3C | U-box domain                                                                                                                 | U-box domain-containing protein 31                                           |
| BraA09g009850.3C | Alpha and gamma adaptin binding protein p34;; Ras family                                                                     | --                                                                           |

|                  |                                                                                                                                              |                                                       |
|------------------|----------------------------------------------------------------------------------------------------------------------------------------------|-------------------------------------------------------|
| BraA09g006850.3C | X8 domain                                                                                                                                    | PLASMODESMATA CALLE-BINDING PROTEIN 1                 |
| BraA09g006430.3C | --                                                                                                                                           | Heavy metal-associated isoprenylated plant protein 39 |
| BraA09g007710.3C | PB1 domain                                                                                                                                   | --                                                    |
| BraA09g006970.3C | --                                                                                                                                           | --                                                    |
| BraA09g010040.3C | Sodium/hydrogen exchanger family                                                                                                             | Cation/H(+) antiporter 15                             |
| BraA09g007320.3C | Exportin 1-like protein                                                                                                                      | Transportin M14                                       |
| BraA09g008680.3C | --                                                                                                                                           | --                                                    |
| BraA09g008520.3C | --                                                                                                                                           | --                                                    |
| BraA09g003870.3C | Transferase family                                                                                                                           | BAHD acyltransferase At3g29680                        |
| BraA09g007620.3C | --                                                                                                                                           | --                                                    |
| BraA09g007370.3C | --                                                                                                                                           | Protein NRT1/ PTR FAMILY 2.11                         |
| BraA09g007490.3C | TFIIS helical bundle-like domain;; BAH domain                                                                                                | --                                                    |
| BraA09g005410.3C | Protein kinase domain;; Protein tyrosine kinase                                                                                              | Shaggy-related protein kinase alpha                   |
| BraA09g009840.3C | Membrane transport protein                                                                                                                   | Protein PIN-LIKES 7                                   |
| BraA09g006170.3C | Protein kinase domain;; Protein tyrosine kinase;; Lipopolysaccharide kinase (Kdo/WaaP) family;; Phosphotransferase enzyme family             | CDPK-related kinase 4                                 |
| BraA09g007980.3C | RING-variant domain                                                                                                                          | --                                                    |
| BraA09g006730.3C | --                                                                                                                                           | Protein BREAKING OF ASYMMETRY IN THE STOMATAL LINEAGE |
| BraA09g005740.3C | Plant self-incompatibility protein S1                                                                                                        | S-protein homolog 13                                  |
| BraA09g007310.3C | HEAT repeats;; HEAT repeat;; HEAT-like repeat                                                                                                | TORTIFOLIA1-like protein 3                            |
| BraA09g003840.3C | TPL-binding domain in jasmonate signalling;; Ethylene-responsive binding factor-associated repression;; Putative nuclear localisation signal | Ninja-family protein AFP3                             |
| BraA09g005120.3C | PWWP domain                                                                                                                                  | --                                                    |
| BraA09g008490.3C | Ras family;; Ras of Complex, Roc, domain of DAPkinase;; ADP-ribosylation factor family                                                       | Ras-related protein RABH1a                            |
| BraA09g005980.3C | Sas10/Utp3/C1D family                                                                                                                        | --                                                    |
| BraA09g006310.3C | Voltage-dependent anion channel                                                                                                              | S-type anion channel SLAH3                            |
| BraA09g008160.3C | --                                                                                                                                           | --                                                    |
| BraA09g005280.3C | Protein phosphatase 2C                                                                                                                       | Probable protein phosphatase 2C 73                    |
| BraA09g009320.3C | Lateral organ boundaries (LOB) domain                                                                                                        | LOB domain-containing protein 36                      |
| BraA09g009130.3C | AP2 domain                                                                                                                                   | Ethylene-responsive transcription factor ERF010       |

|                  |                                                                                                                                                       |                                                                |
|------------------|-------------------------------------------------------------------------------------------------------------------------------------------------------|----------------------------------------------------------------|
| BraA09g006040.3C | FAD binding domain of DNA photolyase;; DNA photolyase                                                                                                 | Cryptochrome DASH, chloroplastic/mitochondrial                 |
| BraA09g005320.3C | Kelch motif;; Kelch motif;; Galactose oxidase, central domain;; Kelch motif;; F-box domain;; Galactose oxidase, central domain;; F-box-like           | F-box/kelch-repeat protein At5g26960                           |
| BraA09g008830.3C | AhpC/TSA antioxidant enzyme;; AhpC/TSA family                                                                                                         | --                                                             |
| BraA09g007340.3C | Biotin/lipoate A/B protein ligase family;; Biotin protein ligase C terminal domain                                                                    | Biotin--protein ligase 2                                       |
| BraA09g009910.3C | AMP-binding enzyme                                                                                                                                    | 4-coumarate--CoA ligase-like 2                                 |
| BraA09g008240.3C | Carbon-nitrogen hydrolase                                                                                                                             | Beta-ureidopropionase                                          |
| BraA09g006400.3C | --                                                                                                                                                    | --                                                             |
| BraA09g009160.3C | Rapid ALkalinization Factor (RALF)                                                                                                                    | Protein RALF-like 34                                           |
| BraA09g009760.3C | La domain                                                                                                                                             | La-related protein 1B                                          |
| BraA09g009930.3C | --                                                                                                                                                    | --                                                             |
| BraA09g008780.3C | --                                                                                                                                                    | Protein CROWDED NUCLEI 4                                       |
| BraA09g005910.3C | --                                                                                                                                                    | --                                                             |
| BraA09g005220.3C | Pectinesterase;; Plant invertase/pectin methylesterase inhibitor                                                                                      | Putative pectinesterase/pectinesterase inhibitor 28            |
| BraA09g007410.3C | 1-deoxy-D-xylulose 5-phosphate reductoisomerase;; 1-deoxy-D-xylulose 5-phosphate reductoisomerase C-terminal;; DXP reductoisomerase C-terminal domain | 1-deoxy-D-xylulose 5-phosphate reductoisomerase, chloroplastic |
| BraA09g010050.3C | 1,3-beta-glucan synthase component;; 1,3-beta-glucan synthase subunit FKS1, domain-1;; Vta1 like                                                      | Calle synthase 5                                               |
| BraA09g008950.3C | NPH3 family                                                                                                                                           | BTB/POZ domain-containing protein NPY3                         |
| BraA09g005710.3C | --                                                                                                                                                    | --                                                             |
| BraA09g010100.3C | Adenylylsulphate kinase                                                                                                                               | Adenylyl-sulfate kinase 1, chloroplastic                       |
| BraA09g007040.3C | U-box domain                                                                                                                                          | U-box domain-containing protein 52                             |
| BraA09g003940.3C | HAUS augmin-like complex subunit 5                                                                                                                    | AUGMIN subunit 5                                               |
| BraA09g009680.3C | Auxin responsive protein                                                                                                                              | Auxin-responsive protein SAUR50                                |
| BraA09g008530.3C | VQ motif                                                                                                                                              | --                                                             |
| BraA09g009540.3C | Mpp10 protein                                                                                                                                         | --                                                             |
| BraA09g006990.3C | Terpene synthase family, metal binding domain;; Terpene synthase, N-terminal domain                                                                   | Terpenoid synthase 25                                          |
| BraA09g005870.3C | Cyclin, N-terminal domain;; Cyclin, C-terminal domain                                                                                                 | Cyclin-A2-1                                                    |
| BraA09g009500.3C | Protein of unknown function, DUF547;; Leucine-zipper of ternary complex                                                                               | --                                                             |

|                  |                                                                                          |                                                          |
|------------------|------------------------------------------------------------------------------------------|----------------------------------------------------------|
|                  | factor MIP1                                                                              |                                                          |
| BraA09g008110.3C | --                                                                                       | --                                                       |
| BraA09g007600.3C | CRAL/TRIO domain;; Divergent CRAL/TRIO domain                                            | Phphatidylinitol/phphatidylcholine transfer protein SFH6 |
| BraA09g006270.3C | Glycosyl hydrolases family 18                                                            | Acidic endochitinase                                     |
| BraA09g009410.3C | Zinc finger, C2H2 type                                                                   | Protein indeterminate-domain 1                           |
| BraA09g005330.3C | SAM dependent carboxyl methyltransferase                                                 | Salicylate/benzoate carboxyl methyltransferase           |
| BraA09g007870.3C | Bacterial transferase hexapeptide (six repeats)                                          | Gamma carbonic anhydrase-like 1, mitochondrial           |
| BraA09g009470.3C | Protein of unknown function (DUF677);; Protein BYPASS1-related                           | UPF0496 protein At5g66675                                |
| BraA09g005370.3C | --                                                                                       | --                                                       |
| BraA09g008910.3C | Adenylylsulphate kinase                                                                  | Adenylyl-sulfate kinase 4, chloroplastic                 |
| BraA09g006280.3C | Peroxidase                                                                               | Probable peroxidase 61                                   |
| BraA09g007770.3C | Radical SAM superfamily                                                                  | --                                                       |
|                  | PPR repeat family;; PPR repeat;; PPR repeat;; Pentatricopeptide repeat domain;;          |                                                          |
| BraA09g006960.3C | Pentacotriptide-repeat region of PRORP;; Mitochondrial 28S ribosomal protein S27         | Pentatricopeptide repeat-containing protein At5g61400    |
| BraA09g006650.3C | Prefoldin subunit                                                                        | Probable prefoldin subunit 5                             |
| BraA09g007220.3C | Embryo-specific protein 3, (ATS3);; PLAT/LH2 domain                                      | Embryo-specific protein ATS3B                            |
| BraA09g009900.3C | AMP-binding enzyme                                                                       | 4-coumarate--CoA ligase-like 2                           |
| BraA09g006070.3C | Protein RETICULATA-related                                                               | Protein RETICULATA-RELATED 6, chloroplastic              |
| BraA09g009180.3C | hAT family C-terminal dimerisation region;; Domain of unknown function (DUF4413)         | Zinc finger BED domain-containing protein RICESLEEPER 2  |
| BraA09g005110.3C | Cyclin C-terminal domain;; Cyclin, N-terminal domain;; Transcription factor TFIIB repeat | Cyclin-H1-1                                              |
| BraA09g009010.3C | Subtilase family;; Peptidase inhibitor I9;; PA domain                                    | Subtilisin-like protease SBT1.7                          |
| BraA09g005950.3C | --                                                                                       | Ethylene-responsive transcription factor ERF003          |
| BraA09g009750.3C | 3-dehydroquinate synthase;; Iron-containing alcohol dehydrogenase;;                      | 3-dehydroquinate synthase, chloroplastic                 |
|                  | Iron-containing alcohol dehydrogenase                                                    |                                                          |
| BraA09g005770.3C | GATA zinc finger                                                                         | GATA transcription factor 12                             |
| BraA09g006410.3C | Transmembrane amino acid transporter protein;; Tryptophan/tyrosine permease family       | Probable amino acid permease 7                           |
| BraA09g006010.3C | CCT motif;; B-box zinc finger                                                            | Zinc finger protein CONSTANS-LIKE 4                      |
| BraA09g006830.3C | --                                                                                       | Histone deacetylase 5                                    |

|                  |                                                                                                                                                                                                     |                                                   |
|------------------|-----------------------------------------------------------------------------------------------------------------------------------------------------------------------------------------------------|---------------------------------------------------|
| BraA09g008560.3C | --                                                                                                                                                                                                  | --                                                |
| BraA09g007570.3C | Glutaredoxin                                                                                                                                                                                        | Glutaredoxin-C1                                   |
| BraA09g008060.3C | Inositol monophosphatase family                                                                                                                                                                     | SAL1 phphatase                                    |
| BraA09g005080.3C | EF hand associated;; Ras family;; EF hand associated;; Ras of Complex, Roc, domain of DAPkinase;; 50S ribosome-binding GTPase;; Dynamin family                                                      | Mitochondrial Rho GTPase 1                        |
| BraA09g005480.3C | Cupin;; Cupin domain                                                                                                                                                                                | Probable germin-like protein subfamily 2 member 5 |
| BraA09g007840.3C | Det1 complexing ubiquitin ligase;; SAP domain                                                                                                                                                       | --                                                |
| BraA09g009480.3C | Mitochondrial calcium uniporter                                                                                                                                                                     | Calcium uniporter protein 3, mitochondrial        |
| BraA09g008250.3C | CHCH domain                                                                                                                                                                                         | --                                                |
| BraA09g006820.3C | RNA recognition motif. (a.k.a. RRM, RBD, or RNP domain)                                                                                                                                             | Glycine-rich RNA-binding protein 3, mitochondrial |
| BraA09g003930.3C | SRF-type transcription factor (DNA-binding and dimerisation domain);; K-box region                                                                                                                  | Truncated transcription factor CAULIFLOWER A      |
| BraA09g005990.3C | Surp module;; RNA recognition motif. (a.k.a. RRM, RBD, or RNP domain);; cwf21 domain                                                                                                                | Protein RRC1                                      |
| BraA09g005010.3C | Ring finger domain;; RING-like zinc finger;; Zinc finger, C3HC4 type (RING finger);; Zinc finger, C3HC4 type (RING finger);; Anaphase-promoting complex subunit 11 RING-H2 finger                   | E3 ubiquitin-protein ligase ATL31                 |
| BraA09g009300.3C | NB-ARC domain;; Arabidopsis broad-spectrum mildew resistance protein RPW8;; Leucine Rich repeats (2 copies);; Leucine rich repeat;; ATPase family associated with various cellular activities (AAA) | Probable disease resistance protein At5g66900     |
| BraA09g008200.3C | Sodium:sulfate symporter transmembrane region;; Citrate transporter                                                                                                                                 | Dicarboxylate transporter 2.1, chloroplastic      |
| BraA09g005860.3C | Permease family                                                                                                                                                                                     | Putative nucleobase-ascorbate transporter 10      |
| BraA09g005060.3C | tRNA synthetase class II core domain (G, H, P, S and T);; Seryl-tRNA synthetase N-terminal domain                                                                                                   | Serine--tRNA ligase, cytoplasmic                  |
| BraA09g006580.3C | HMG (high mobility group) box;; HMG-box domain                                                                                                                                                      | High mobility group B protein 7                   |
| BraA09g006670.3C | K-box region                                                                                                                                                                                        | Protein TRANSPARENT TESTA 16                      |
| BraA09g007930.3C | Protein kinase domain;; Protein tyrosine kinase                                                                                                                                                     | Cyclin-dependent kinase E-1                       |
| BraA09g008390.3C | EamA-like transporter family                                                                                                                                                                        | WAT1-related protein At5g64700                    |
| BraA09g008750.3C | Reverse transcriptase (RNA-dependent DNA polymerase)                                                                                                                                                | Putative ribonuclease H protein At1g65750         |
| BraA09g009730.3C | Glycosyl hydrolases family 38 C-terminal domain;; Glycosyl hydrolases family 38 N-terminal domain;; Proteasome subunit;; Alpha mannosidase middle domain                                            | Probable alpha-mannidase At5g66150                |
| BraA09g006460.3C | WD domain, G-beta repeat                                                                                                                                                                            | WD repeat-containing protein RUP2                 |



|                  |                                                                                                                                        |                                                                             |
|------------------|----------------------------------------------------------------------------------------------------------------------------------------|-----------------------------------------------------------------------------|
| BraA09g005750.3C | AUX/IAA family                                                                                                                         | Auxin-responsive protein IAA28                                              |
| BraA09g006700.3C | Protein of unknown function (DUF1604);; Surp module                                                                                    | G patch domain-containing protein TGH                                       |
| BraA09g010090.3C | PA domain;; Complement C1r-like EGF-like                                                                                               | Vacuolar-sorting receptor 3                                                 |
| BraA09g009020.3C | Subtilase family;; Peptidase inhibitor I9;; PA domain                                                                                  | Subtilisin-like protease SBT1.7                                             |
| BraA09g005270.3C | Leucine Rich repeat;; Leucine Rich repeats (2 copies)                                                                                  | F-box/LRR-repeat protein 3                                                  |
| BraA09g008220.3C | NPH3 family                                                                                                                            | Root phototropism protein 3                                                 |
| BraA09g007300.3C | Plant self-incompatibility protein S1                                                                                                  | S-protein homolog 25                                                        |
| BraA09g009620.3C | --                                                                                                                                     | --                                                                          |
| BraA09g005690.3C | WRKY DNA -binding domain                                                                                                               | Probable WRKY transcription factor 50                                       |
| BraA09g008350.3C | Pectinesterase;; Plant invertase/pectin methylesterase inhibitor                                                                       | Probable pectinesterase/pectinesterase inhibitor 64                         |
| BraA09g006520.3C | JAB1/Mov34/MPN/PAD-1 ubiquitin protease;; Maintenance of mitochondrial structure and function;; Prokaryotic homologs of the JAB domain | 26S proteasome non-ATPase regulatory subunit 14 homolog                     |
| BraA09g005620.3C | --                                                                                                                                     | Probable membrane-associated kinase regulator 1                             |
| BraA09g009120.3C | Protein tyrosine kinase;; Protein kinase domain                                                                                        | Putative disease resistance RPP13-like protein 3                            |
| BraA09g009050.3C | Armadillo/beta-catenin-like repeat;; U-box domain;; Armadillo-like                                                                     | U-box domain-containing protein 2                                           |
| BraA09g005960.3C | --                                                                                                                                     | Zinc finger protein 3                                                       |
| BraA09g009600.3C | --                                                                                                                                     | Lipid phosphate phosphatase epsilon 2, chloroplastic                        |
| BraA09g008580.3C | Ras family;; Ras of Complex, Roc, domain of DAPkinase;; ADP-ribosylation factor family;; 50S ribosome-binding GTPase                   | Ras-related protein RABA4a                                                  |
| BraA09g008330.3C | MOZ/SAS family;; RNA binding activity-knot of a chromodomain                                                                           | Histone acetyltransferase of the MYST family 1                              |
| BraA09g005700.3C | Possible lysine decarboxylase                                                                                                          | Cytokinin ribide 5'-monophosphate phosphoribohydrolase LOG8                 |
| BraA09g009460.3C | Oligosaccharyltransferase 48 kDa subunit beta                                                                                          | Dolichyl-diphosphooligaccharide--protein glycosyltransferase 48 kDa subunit |
| BraA09g007060.3C | --                                                                                                                                     | --                                                                          |
| BraA09g009960.3C | PLATZ transcription factor                                                                                                             | --                                                                          |
| BraA09g006080.3C | --                                                                                                                                     | DNA-binding protein BIN4                                                    |
| BraA09g007100.3C | Brix domain                                                                                                                            | Peter Pan-like protein                                                      |
| BraA09g008150.3C | Ribosomal protein S28e                                                                                                                 | 40S ribosomal protein S28-2                                                 |
| BraA09g007800.3C | Adenylate kinase;; AAA domain;; Adenylate kinase, active site lid                                                                      | Adenylate kinase 4                                                          |
| BraA09g006130.3C | --                                                                                                                                     | --                                                                          |

---

**Table S4 Primers used in this study**

| Primer       | Primer sequence (5'-3')   | Purpose                                                                                                              |
|--------------|---------------------------|----------------------------------------------------------------------------------------------------------------------|
| GOLDEN-F     | ATGTCTTGTTTGGGTAGGATCTTG  | Amplification of <i>BrGOLDEN</i> in cDNA and gDNA                                                                    |
| GOLDEN-R     | TCAAAGGAAAGGATCAATCCGAGG  |                                                                                                                      |
| q-CRTISO-F   | ATGGAAAGGCTGTGGGTGTAAG    | QRT-PCR primers for the <i>BrCRITISO</i> ( <i>BraA09g063710.3C</i> ) gene in Chinese cabbage                         |
| q-CRTISO-R   | GGCAATCTGTATCTGGAGGGAG    |                                                                                                                      |
| q-ZDS-F      | AACTCAAGCCCTATGACAAGC     | QRT-PCR primers for the <i>BrZDS</i> ( <i>BraA05g040310.3C</i> ) gene in Chinese cabbage                             |
| q-ZDS-R      | AAGGAACCAATCCGAGAAACT     |                                                                                                                      |
| q-LCYB-F     | AGGTGCTGGTGGTGCTTACTC     | QRT-PCR primers for the <i>BrLCYB</i> ( <i>BraA03g017230.3C</i> ) gene in Chinese cabbage                            |
| q-LCYB-R     | TTCCTGTGGTCCTTGTGGTTG     |                                                                                                                      |
| q-VDE-F      | ATTGTTTCACTTCACCTTGTC     | QRT-PCR primers for the <i>BrVDE</i> ( <i>BraA06g005700.3C</i> ) gene in Chinese cabbage                             |
| q-VDE-R      | GGATTTCGCAGTTACTCTTAG     |                                                                                                                      |
| q-DXS-F      | GAAGCAGAGGTAGACAAGGACGT   | QRT-PCR primers for the <i>BrDXS</i> ( <i>BraA01g021140.3C</i> ) gene in Chinese cabbage                             |
| q-DXS-R      | AAGAATAGATTGCACAGAAAGGC   |                                                                                                                      |
| q-ZEP-F      | TGGGTGTTGGGCTTGGTCC       | QRT-PCR primers for the <i>BrZEP</i> ( <i>BraA07g016880.3C</i> and <i>BraA07g016890.3C</i> ) gene in Chinese cabbage |
| q-ZEP-R      | GGCATAGCAATGTCAATGAAGAATC |                                                                                                                      |
| q-PSY-F      | GTTTGAGTTTGTGGGTGA        | QRT-PCR primers for the <i>BrPSY</i> ( <i>BraA02g006890.3C</i> ) gene in Chinese cabbage                             |
| q-PSY-R      | TCTTCTAACCTTGCTTCCC       |                                                                                                                      |
| qGGPPS11.1-F | GCGAGGTGTGTTGGTTTGTGTTTCA | QRT-PCR primers for the <i>BrGGPPS11.1</i> ( <i>BraA08g021280.3C</i> ) gene in Chinese cabbage                       |
| qGGPPS11.1-R | TTTCCCAGCAGTTTCCCAGTTCTT  |                                                                                                                      |
| qGGPPS11.2-F | CGAAAGCTATAGGAACCGAA      | QRT-PCR primers for the <i>BrGGPPS11.2</i> ( <i>BraA01g002000.3C</i> ) gene in Chinese cabbage                       |
| qGGPPS11.2-R | GTCATCAACCACCTGAAACA      |                                                                                                                      |
| qBCH2-F      | GAGGCTTGAGAAAGAGGAGAGGAAG | QRT-PCR primers for the <i>BrBCH2</i> ( <i>BraA10g010930.3C</i> )                                                    |

|                                  |                                                             |                                                                                                                                                       |
|----------------------------------|-------------------------------------------------------------|-------------------------------------------------------------------------------------------------------------------------------------------------------|
| qBCH2-R                          | CCAATAAAATCGGTAGTAAACGGAC                                   | gene in Chinese cabbage                                                                                                                               |
| qCYP97C1-F                       | AAGGACCGATCCCTAACGAAACAAA                                   | QRT-PCR primers for the <i>CYP97C1</i> ( <i>BraA07g021850.3.5C</i> )                                                                                  |
| qCYP97C1-R                       | GAGAAAGACCGCAAGTGCCACTATT                                   | gene in Chinese cabbage                                                                                                                               |
| qCYP97A35-F                      | GCTTTTCCTTACTTACGGTGG                                       | QRT-PCR primers for the <i>CYP97A3</i> ( <i>BraA08g009810.3C</i> )                                                                                    |
| qCYP97A3-R                       | AGCAGGTATGAGTCCTTTCCC                                       | gene in Chinese cabbage                                                                                                                               |
| q-ACTIN-F                        | GGAGCTGAGAGATTCCGTTG                                        | QRT-PCR primers for the <i>BrACTIN</i> gene in Chinese cabbage                                                                                        |
| q-ACTIN-R                        | GAACCACCACTGAGGACGAT                                        |                                                                                                                                                       |
| q-golden-F                       | GAGTCAAGTAGACCCAATAGTAGCGTCC                                | QRT-PCR primers for the <i>Brgolden</i> gene in non-golden head                                                                                       |
| q-golden-R                       | CACGTTGTTGACTTCAACAACCATCAAC                                | Chinese cabbage                                                                                                                                       |
| q-GOLDEN-F                       | GAGTCAAGTAGACCCAATAGTGGCGTCA                                | QRT-PCR primers for the <i>BrGOLDEN</i> gene in golden head                                                                                           |
| q-GOLDEN-R                       | CACGTTGTAACTTCAACTACCATCAAA                                 | Chinese cabbage                                                                                                                                       |
| HA-GOLDEN-F                      | <u>gacgatgacgataagggatcc</u> ATGTCTTGTGTTGGGTA<br>GGATCTTGT | Homologous arm primers used to construct <i>35S::BrGOLDEN</i> vector, Underscores indicate <i>BamH I</i> site and <i>Xba I</i> site, respectively.    |
| HA-GOLDEN-R                      | tgctgcaggtcgactctagaTCAAAGGAAGGGATC<br>AATACGAG             |                                                                                                                                                       |
| HA-GOLDEN <sup>Pro</sup> -F      | <u>gccaagcttgcatgcctgcagg</u> GGGGTTCACATAGTGTT<br>TCTTACAA | Homologous arm primers used to construct <i>ProBrgolden::GUS</i> vector, Underscores indicate <i>Sbf I</i> site and <i>BamH I</i> site, respectively. |
| HA-GOLDEN <sup>Pro</sup> -R      | <u>ggactgaccacccgggatcc</u> GGTTTCGAAGTCTTCAG<br>CAGCA      |                                                                                                                                                       |
| GOLDEN <sub>Del</sub> -PBT3-N-F  | ATCGAATTCCTGCAGGGCCATTACGGCCATGT<br>CTTGTTTGG               | Primers for Synthesis of Bait Plasmid GOLDEN <sub>Del</sub> -PBT3-N in Membrane System Y2H                                                            |
| GOLDEN <sub>Del</sub> -PBT3-N-R  | AGCTACTTACCATGGGCCGAGGCGGCCTCAAA<br>GGAAGGGATC              |                                                                                                                                                       |
| GOLDEN <sub>Ldel</sub> -PGBKT7-F | TCAGAGGAGGACCTGCATATGTCTTGTGTTGGG<br>TAGGATCTTG             | Primers for Synthesis of Bait Plasmid GOLDEN <sub>Del</sub> -PBT3-N in Nuclear System Y2H                                                             |
| GOLDEN <sub>Ldel</sub> -PGBKT7-R | TCGACGGATCCCCGGAATTCTCAAAGGAAGG                             |                                                                                                                                                       |

|                                 |                                   |                                                                                               |
|---------------------------------|-----------------------------------|-----------------------------------------------------------------------------------------------|
|                                 | GATCAATAC                         |                                                                                               |
| golden-PBT3-N-F                 | ATCGAATTCCTGCAGGGCCATTACGGCCATGT  | Primers for Synthesis of Bait Plasmid golden-PBT3-N in<br>Membrane System Y2H                 |
|                                 | CTTGTTTGG                         |                                                                                               |
| golden-PBT3-N-R                 | AGCTACTTACCATGGGCCGAGGCGGCCTCAAA  |                                                                                               |
|                                 | GGAAGGGATC                        |                                                                                               |
| PSY-PPR3-N-F                    | ACGATGTTCCAGATTACGCTGGATCCATGTCTT | Primers for Synthesis of Bait Plasmid PSY-PPR3-N in<br>Membrane System Y2H                    |
|                                 | CTGTAGCAGTGTTATGGGTTGCTTCC        |                                                                                               |
| PSY-PPR3-N-R                    | GTATCGATAAGCTTGATATCGAATTCTTAAGTT |                                                                                               |
|                                 | G TTCCTCTTGAAC TTGGAGTCTTTAG      |                                                                                               |
| PSY-PGADT7-F                    | GTACCAGATTACGCTCATATGTCTTCTGTAGCA | Primers for Synthesis of Bait Plasmid PSY-PGADT7 in<br>Nuclear System Y2H                     |
|                                 | GTGTTATG                          |                                                                                               |
| PSY-PGADT7-R                    | CAGCTCGAGCTCGATGGATCCTTAAGTTGTTC  |                                                                                               |
|                                 | CTCTTGAAC                         |                                                                                               |
| GLODEN <sub>Ins</sub> -PBT3-N-F | TCGAATTCCTGCAGGGCCATTACGGCCATGTC  | Primers for Synthesis of Bait Plasmid GLODEN <sub>Ins</sub> -PBT3-N in<br>Membrane System Y2H |
|                                 | TTGTTTGG                          |                                                                                               |
| GLODEN <sub>Ins</sub> -PBT3-N-R | GCTACTTACCATGGGCCGAGGCGGCCTCAAAG  |                                                                                               |
|                                 | GAAGGGATC                         |                                                                                               |
| goldenPro-F                     | GGGGTTCACATAGTGTTCCTTAC           | Primers used to amplify <i>Brgolden</i> promoter fragments                                    |
| goldenPro-R                     | CAAGATCCTACCCAAACAAGACAT          |                                                                                               |

---
