# Supplementary material for: Mapping and Validation of BrGOLDEN: A Dominant Gene Regulating Carotenoid Accumulation in Brassica rapa
Source: MDPI journal article supplement (doi:10.3390/ijms232012442), 2022-10-18
Supplement: s1 [file s1]

## Supplementary Figures

|                                 |                                                                    |     |
|---------------------------------|--------------------------------------------------------------------|-----|
| <i>Brgolden</i> <sub>wt</sub>   | MSCLGRILSVSHPPDFYGSRRFSVSKLSSPGRNQRLRWRFTALDSDSSSLDSDSSDKFASG      | 60  |
| <i>BrGOLDEN</i> <sub>Ins</sub>  | MSCLGRILSVSYPPDFSGSRLSVSKLSSPGRNRRLRWRFTALDSDSSSLDSDSSDKFAAG       | 60  |
| <i>BrGOLDEN</i> <sub>Del</sub>  | MSCLGRILSVSYPPDFSGSRLSVSKLSSPGRNRRLRWRFTALDSDSSSLDSDSSDKFAAG       | 60  |
| <i>BrGOLDEN</i> <sub>Ldel</sub> | MSCLGRILSVSYPPDFSGSRLSVSKLSSPGRNRRLRWRFTALDSDSSSLDSDSSDKFAAG       | 60  |
| Consensus                       | msclgrilsvsyppdpsgsrlsvsklsspgnrnrlrwrftaldsdssslsdssdkfaag        |     |
| <i>Brgolden</i> <sub>wt</sub>   | FCIIEGPETVQDFAKMQLQEIQDNIRSRNKIFLHMEEVRRRLRIQQRIRNTELGIIDEEQ       | 120 |
| <i>BrGOLDEN</i> <sub>Ins</sub>  | FCIIEGPETVQDFAKMQLQEIQDNIRSRNKIFLHMEEVRRRLRIQQRIRNTELGIIDEEQ       | 120 |
| <i>BrGOLDEN</i> <sub>Del</sub>  | FCIIEGPETVQDFAKMQLQEIQDNIRSRNKIFLHMEEVRRRLRIQQRIRNTELGIIDEEQ       | 120 |
| <i>BrGOLDEN</i> <sub>Ldel</sub> | FCIIEGPETVQDFAKMQLQEIQDNIRSRNKIFLHMEEVRRRLRIQQRIRNTELGIIDEEQ       | 120 |
| Consensus                       | fciiegpvetvqdfakmqlqeiqdnirsrnkiflhmeevrrlriqqrirntelgiideeq       |     |
| <i>Brgolden</i> <sub>wt</sub>   | EHEL.....PNFPSFIFPLPPI...TAANLRVYYATCFSLIAGIILFGGLLAPTL            | 167 |
| <i>BrGOLDEN</i> <sub>Ins</sub>  | EHELKSQNPNLIIQHEL...PNFPSFIFPLPPI...TAANLRVYYATCFSLIAGIILFGGLLAPTL | 180 |
| <i>BrGOLDEN</i> <sub>Del</sub>  | EHELKSQNPNL.....TAANLRVYYATCFSLIAGIILFGGLLAPTL                     | 161 |
| <i>BrGOLDEN</i> <sub>Ldel</sub> | EHELKSQNPNL.....L                                                  | 132 |
| Consensus                       | ehelksqnpnlpnfpsfiflplptaanlrvyatcfsliaagiilfggllaptl              |     |
| <i>Brgolden</i> <sub>wt</sub>   | ELKLIGIGTSYKDFIQSLHLPMLQSQVDPIVASFSGGAVGVISALMVVEVNNVKQGEHKKR      | 227 |
| <i>BrGOLDEN</i> <sub>Ins</sub>  | ELKLIGIGTSYKDFIQSLHLPMLQSQVDPIVASFSGGAVGVISALMVVEVNNVKQGEHKKR      | 240 |
| <i>BrGOLDEN</i> <sub>Del</sub>  | ELKLIGIGTSYKDFIQSLHLPMLQSQVDPIVASFSGGAVGVISALMVVEVNNVKQGEHKKR      | 221 |
| <i>BrGOLDEN</i> <sub>Ldel</sub> | ELKLIGIGTSYKDFIQSLHLPMLQSQVDPIVASFSGGAVGVISALMVVEVNNVKQGEHKKR      | 192 |
| Consensus                       | elkligigtsykdfiqslhlpmlsqvdpivasfsggavgvisalmvvevnnvkqgehkr        |     |
| <i>Brgolden</i> <sub>wt</sub>   | CKYCLGTGYLACARCSSTGSLIIEFPVSAIAGGNHSVSTSKTERCSNCSGAGKVMCPTCL       | 287 |
| <i>BrGOLDEN</i> <sub>Ins</sub>  | CKYCLGTGYLACARCSSTGSLIIEFPVSAIAGGNHSVSTSKTERCSNCSGAGKVMCPTCL       | 300 |
| <i>BrGOLDEN</i> <sub>Del</sub>  | CKYCLGTGYLACARCSSTGSLIIEFPVSAIAGGNHSVSTSKTERCSNCSGAGKVMCPTCL       | 281 |
| <i>BrGOLDEN</i> <sub>Ldel</sub> | CKYCLGTGYLACARCSSTGSLIIEFPVSAIAGGNHSVSTSKTERCSNCSGAGKVMCPTCL       | 252 |
| Consensus                       | ckyclgtgylacarcstgsliefpvsaiaggnhsvstsktercsncsgagkvmcptcl         |     |
|                                 | CxxCxGxG CxxCxSxG CxxCxGxG CxxCx                                   |     |
| <i>Brgolden</i> <sub>wt</sub>   | CTGVAMASEHDPRIDPFI.....                                            | 305 |
| <i>BrGOLDEN</i> <sub>Ins</sub>  | CTGVAMASEHDPRIDPFI.....                                            | 318 |
| <i>BrGOLDEN</i> <sub>Del</sub>  | CTGVAMASEHDPRIDPFI.....                                            | 299 |
| <i>BrGOLDEN</i> <sub>Ldel</sub> | CTGVAMASEHDPRIDPFI.....                                            | 270 |
| Consensus                       | ctgvamasehdpridpfi                                                 |     |
|                                 | CxG                                                                |     |

Figure S1. Comparison of amino acid sequences of five transcripts. Red words indicate four conserved C××C×××G motifs.

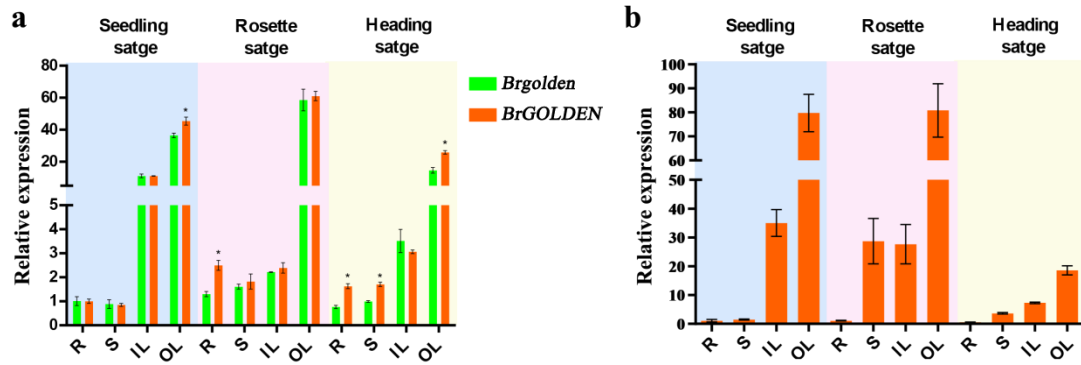

**Figure S2. Comparison of *Brgolden* and *BrGOLDEN* expression in lines '1900262' and '1900264'.**

(a) Expression comparison of the *Brgolden* and *BrGOLDEN* in different periods of the line '1900264'.

(b) Expression analysis of *Brgolden* in line '1900262'. R: roots; S: short stems; IL: inner leaves; and

OL: outer leaves. Asterisk (\*) indicates that there is a statistical difference,  $P \leq 0.05$ ,  $n = 3$ .

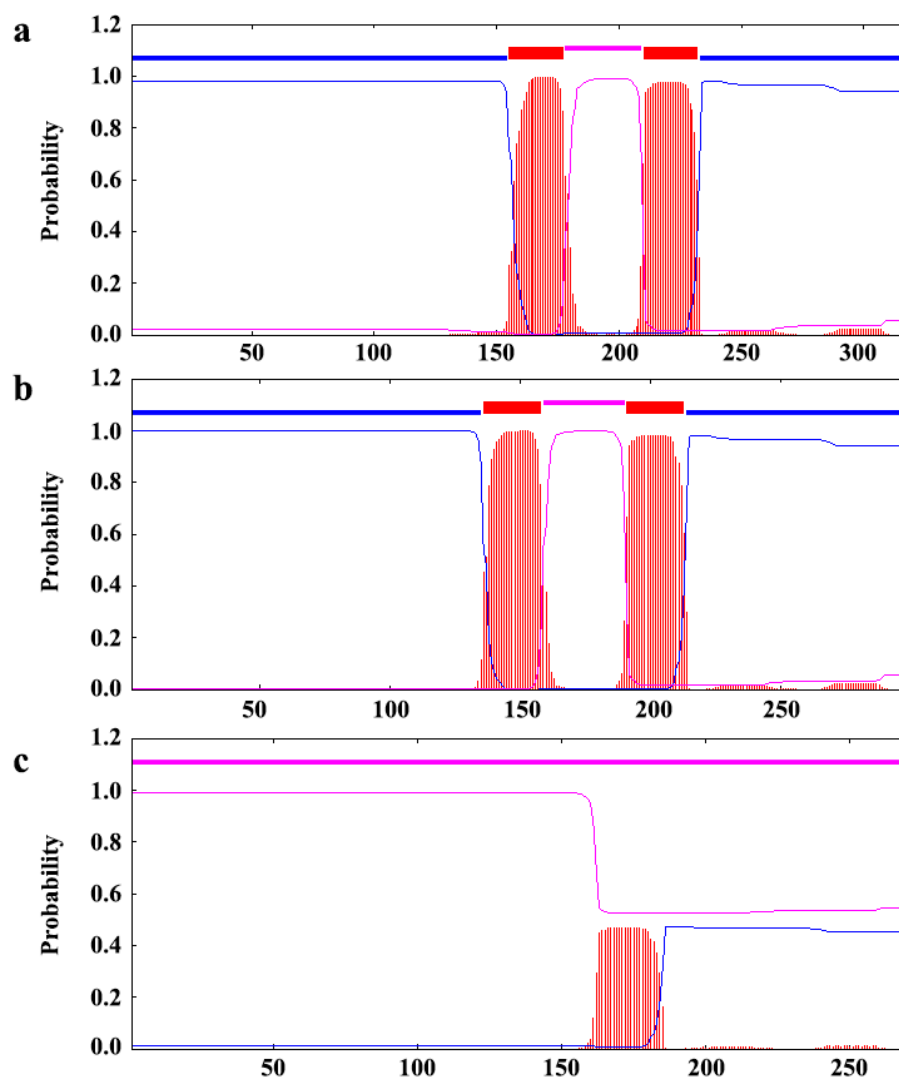

**Figure S3. Prediction of transmembrane helices in BrGOLDEN proteins.** Analysis of transmembrane domains of BrGOLDEN<sub>Ins</sub> (a), BrGOLDEN<sub>Del</sub> (b), and BrGOLDEN<sub>Ldel</sub> (c). Red lines represent the transmembrane. Blue lines represent the inside. Pink lines represent the outside. The abscissa indicates the amino acid site.

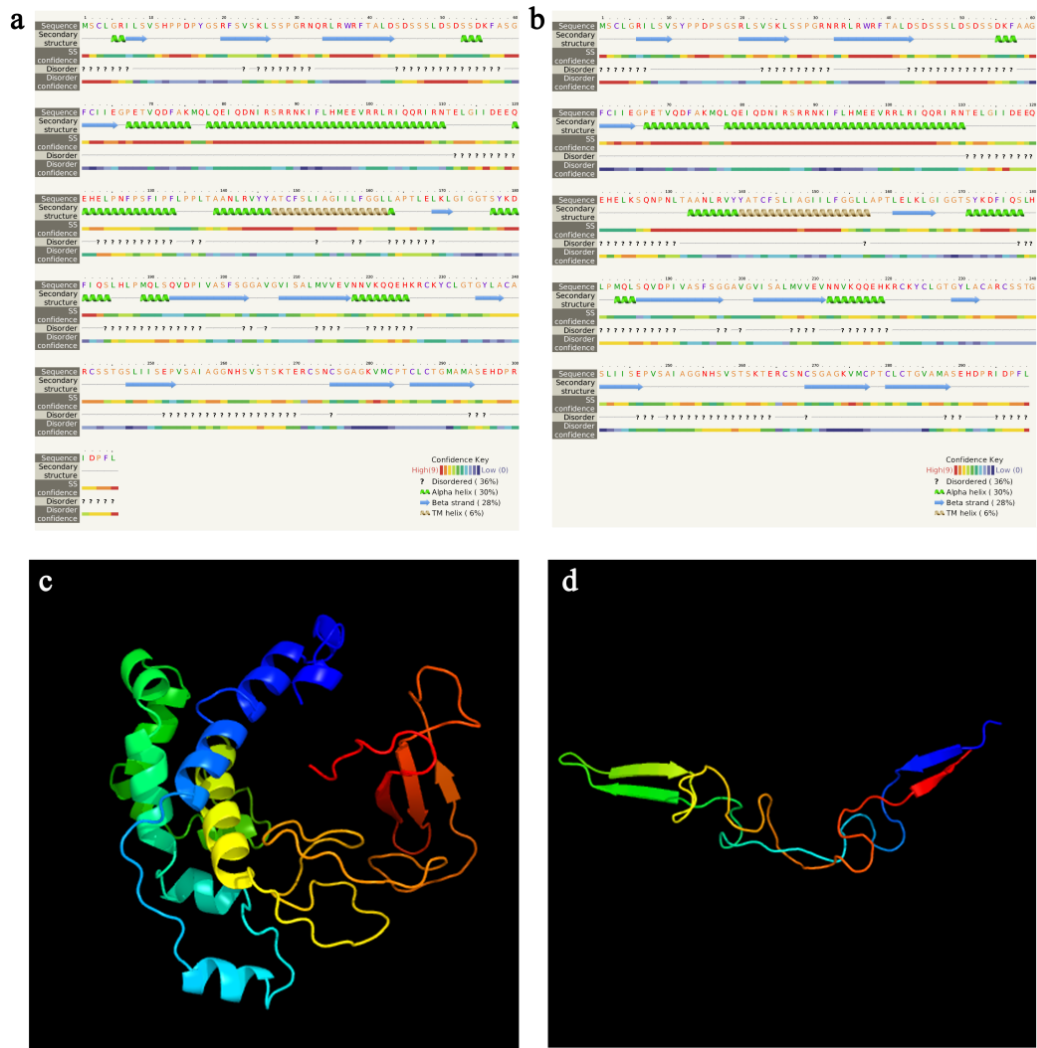

**Figure S4 Phyre2 predicts protein structure.** Brgolden<sub>wt</sub> (a) and BrGOLDEN<sub>Del</sub> (b) proteins structure prediction; Three-dimensional (3D) model analysis of Brgolden<sub>wt</sub> (c) and BrGOLDEN<sub>Del</sub> (d).

BoOR-LTR AACACGAACTAAAGTCGAGAATCCGAACTTGGTATGATCGTATGAACACAAACTTAATAAACTTTGCTTTGTCTTATTAATCTTCTTAGCTTCTCTCTTTTTCTTATTAATAA  
GOLDEN-LTR AACACGAACTAAAGTCGAGAATCCGAACTTGGTATGATCGTATGAACACAAACTTAATAAACTTTGCTTTGTCTTATTAATCTTCTTAGCTTCTCTCTTTTTCTTATTAATAA  
\*\*\*\*\*  
BoOR-LTR ACTCTCTTACACTTAGGCTTCTTATATAGGCAATAGAAATCTTAACCTTATCTTATACATATTAATCTAGGAATCTTAACCTAGCTTATCTTTATCTCTAAATCTAATTGTATAAGTTAT  
GOLDEN-LTR ACTCTCTTACACTTAGGCTTCTTATATAGGCAATAGAAATCTTAACCTTATCTTATACATATTAATCTAGGAATCTTAACCTAGCTTATCTTTATCTCTAAATCTAATTGTATAAGTTAT  
\*\*\*\*\*  
BoOR-LTR TCCTCTTTCCTTTTTGAATAACTTATTACTCAAGTAACTTTGAAGCTTATCCAACTTCCTCTTTAAGCTTCAAACCACTTTCACTTAGGTTTGAACCTCAATCATGCACCTCATTT  
GOLDEN-LTR TCCTCTTTCCTTTTTGAATAACTTATTACTCAAGTAACTTTGAAGCTTATCCAACTTCCTCTTTAAGCTTCAAACCACTTTCACTTAGGTTTGAACCTCAATCATGCACCTCATTT  
\*\*\*\*\*  
BoOR-LTR CCTTGAATTTGATCTTGGCCAATGCTTAGTTAGGATGTCTGCTTCTGCTCTGTTCCCGGTACATGTTCCACATCAATGAGATTGGCTCAACACATTCCTCAATGAAGTAAACCTCT  
GOLDEN-LTR CCTTGAATTTGATCTTGGCCAATGCTTAGTTAGGATGTCTGCTTCTGCTCTGTTCCCGGTACATGTTCCACATCAATGAGATTGGCTCAACACATTCCTCAATGAAGTAAACCTCT  
\*\*\*\*\*  
BoOR-LTR TGTGGATATGCTTGTCTGTCGGTGAAGACTGGATTCTTTGCAAGAGATATAGCTGACTTGTATCGACTAGAATCAGTGTCTTCCGCTCACCTCTGTTACTTCACTCAAGAGTT  
GOLDEN-LTR TGTGGATATGCTTGTCTGTCGGTGAAGACTGGATTCTTTGCAAGAGATATAGCTGACTTGTATCGACTAGAATCAGTGTCTTCCGCTCACCTCTGTTACTTCACTCAAGAGTT  
\*\*\*\*\*  
BoOR-LTR CTTGTAAACAGATAGCTGTTTAGCAGCTCCGTTGACGCCATGAATCGGCTTCGACGAGTACAACGCCACTGTGCTTGTGTTCTGAGAGACCAAGTGAATGGTGTGTTCTAGAC  
GOLDEN-LTR CTTGTAAACAGATAGCTGTTTAGCAGCTCCGTTGACGCCATGAATCGGCTTCGACGAGTACAACGCCACTGTGCTTGTGTTCTGAGAGACCAAGTGAATGGTGTGTTCTAGAC  
\*\*\*\*\*  
BoOR-LTR AGAACAGGTGACTGTTGTGCTCTTCCATCGTCCGGATCAGTATTGTGACTACTGTCCGCTGACCCACAAGTTTCTGTACTTCCAGCTTTAACTCTAGACCATGCCGAGAGTT  
GOLDEN-LTR AGAACAGGTGACTGTTGTGCTCTTCCATCGTCCGGATCAGTATTGTGACTACTGTCCGCTGACCCACAAGTTTCTGTACTTCCAGCTTTAACTCTAGACCATGCCGAGAGTT  
\*\*\*\*\*  
BoOR-LTR CTTGTAGATATCTTAAACTTGCCTTAACGCATTCCCGTGAGACTCTCTCGGTTGATGATATATCTACTTAGGATCCCACTGAGTATGCCATGTCTGGCTAGTGTGATTAAGTACC  
GOLDEN-LTR CTTGTAGATATCTTAAACTTGCCTTAACGCATTCCCGTGAGACTCTCTCGGTTGATGATATATCTACTTAGGATCCCACTGAGTATGCCATGTCTGGCTAGTGTGATTAAGTACC  
\*\*\*\*\*  
BoOR-LTR TTAAGCACCACATCTTCTCGATATTGAGTTGATCAATCTCTGGTTTATCCAGTGCCCTTGAGAATTGTAGACCGAACTCCATTGGAATACAAATTTGGATTGCAATGGGCCATACCTG  
GOLDEN-LTR TTAAGCACCACATCTTCTCGATATTGAGTTGATCAATCTCTGGTTTATCCAGTGCCCTTGAGAATTGTAGACCGAACTCCATTGGAATACAAATTTGGATTGCAATGGGCCATACCTG  
\*\*\*\*\*  
BoOR-LTR ATTCTTCCATGATCCGTTTGCATAGGCTCTTGTGTTGATTGTGATCCCTCTAGTGCTCTGCTTACTTCAATGCCTAGATAATAGTTAGCAACCCGAGATCAGACATTTCAAACCTGT  
GOLDEN-LTR ATTCTTCCATGATCCGTTTGCATAGGCTCTTGTGTTGATTGTGATCCCTCTAGTGCTCTGCTTACTTCAATGCCTAGATAATAGTTAGCAACCCGAGATCAGACATTTCAAACCTGT  
\*\*\*\*\*  
BoOR-LTR GTGACATCGCTGTCTGAACTCTTTGATGATCTTTGTGAAATTTCCTGTAACAAGAGATCATCCACATATATTGCGATAATCAGAAGCTTATCTCCTCTCTCTCTCTGTAAGCCGAGC  
GOLDEN-LTR GTGACATCGCTGTCTGAACTCTTTGATGATCTTTGTGAAATTTCCTGTAACAAGAGATCATCCACATATATTGCGATAATCAGAAGCTTATCTCCTCTCTCTCTCTGTAAGCCGAGC  
\*\*\*\*\*  
BoOR-LTR TTTCTTTATGCACTTCTTGAACCGAACTCTTAAGAAGCGGATCGAGTTAGTATTCCAAGCGGAGGAGCTTGCTTAGACCATATAGTGCTTTGAGAGTTGAAACCTTTATGTT  
GOLDEN-LTR TTTCTTTATGCACTTCTTGAACCGAACTCTTAAGAAGCGGATCGAGTTAGTATTCCAAGCGGAGGAGCTTGCTTAGACCATATAGTGCTTTGAGAGTTGAAACCTTTATGTT  
\*\*\*\*\*  
BoOR-LTR CTCTCCCTTTTTTCAAACCTTCAGGTTGAGTTACATAGACTTCTTCATTCAATTCTCCATGTAAGAATGCCGCTTGGAGCTAGGTTGAGTGAAGTTCCCATCCCTTTGCGAAGCTA  
GOLDEN-LTR CTCTCCCTTTTTTCAAACCTTCAGGTTGAGTTACATAGACTTCTTCATTCAATTCTCCATGTAAGAATGCCGCTTGGAGCTAGGTTGAGTGAAGTTCCCATCCCTTTGCGAAGCTA  
\*\*\*\*\*  
BoOR-LTR AGCTGATTAAGAGTCGAATGGACTCTATACGAGCTACTGGAGCAACACTTCTTCAAAATCAATTCCATGCTCTTGATACATATCCCTTTGCTACAAGTCTTGCTTTGAATTTGTTGATTG  
GOLDEN-LTR AGCTGATTAAGAGTCGAATGGACTCTATACGAGCTACTGGAGCAACACTTCTTCAAAATCAATTCCATGCTCTTGATACATATCCCTTTGCTACAAGTCTTGCTTTGAATTTGTTGATTG  
\*\*\*\*\*  
BoOR-LTR ATCCATCTCGCTTCTTTTGATCTTGAAATCCACTTAAGACCAATGACTTTAACTCCGTGGCTTATCTACCAACTTCCATGTCTGGTTTCTGTTGATAGAGTCAATCTCATCTTCGC  
GOLDEN-LTR ATCCATCTCGCTTCTTTTGATCTTGAAATCCACTTAAGACCAATGACTTTAACTCCGTGGCTTATCTACCAACTTCCATGTCTGGTTTCTGTTGATAGAGTCAATCTCATCTTCGC  
\*\*\*\*\*  
BoOR-LTR ATGCTTTTGTCCATCGAACATGATCTTAGCTTCTTGGTATGTTGATGGTTCACTGTTGATTGAACACAGGAGTAGTTCGATTCTATCTCGCGAGTAGAATGTAATCTTCTAGGTGT  
GOLDEN-LTR ATGCTTTTGTCCATCGAACATGATCTTAGCTTCTTGGTATGTTGATGGTTCACTGTTGATTGAACACAGGAGTAGTTCGATTCTATCTCGCGAGTAGAATGTAATCTTCTAGGTGT  
\*\*\*\*\*  
BoOR-LTR TGGGAAGTTTACTTCTCTAGATGATCTTCTGGTTGACGTGATCTACCTCGGGGGTTGGCTCTGTTGTTCTTCTTGTGTTGAGTCTCAGTTGCAATATTTCTTCTGATGTGAAC  
GOLDEN-LTR TGGGAAGTTTACTTCTCTAGATGATCTTCTGGTTGACGTGATCTACCTCGGGGGTTGGCTCTGTTGTTCTTCTTGTGTTGAGTCTCAGTTGCAATATTTCTTCTGATGTGAAC  
\*\*\*\*\*  
BoOR-LTR CTATGACAAAACGGACCGTTACCTCGTCTATGCTTGTATCCCAAGTCAATGGAAGTTCGACAGATTCTTCTGGTTTCCCTTATCTGTTTCATTCCAGTTCCAGCATGCTTTCTCATCGA  
GOLDEN-LTR CTATGACAAAACGGACCGTTACCTCGTCTATGCTTGTATCCCAAGTCAATGGAAGTTCGACAGATTCTTCTGGTTTCCCTTATCTGTTTCATTCCAGTTCCAGCATGCTTTCTCATCGA  
\*\*\*\*\*  
BoOR-LTR ACTTCACGTCTCGACTAACCACAATCCTTCTCGTCTAGGATTATATAAGCGGTAAGCTTTTCGACCTGGTCTATACCAAGGTGAACAGTGTCTGTGATCTGTCATCGAGTTCTTCA  
GOLDEN-LTR ACTTCACGTCTCGACTAACCACAATCCTTCTCGTCTAGGATTATATAAGCGGTAAGCTTTTCGACCTGGTCTATACCAAGGTGAACAGTGTCTGTGATCTGTCATCGAGTTCTTCA  
\*\*\*\*\*  
BoOR-LTR AAAGGGCAGCATCGAGTTTGGCATATGCCAAACAGCCAAAGACTCTGATGTGCCAATGCTCGGCTTCTTCCCTTGAACCTCTATAAGGAGTTGATTCTTCAAAGCTCTAGTTGGAA  
GOLDEN-LTR AAAGGGCAGCATCGAGTTTGGCATATGCCAAACAGCCAAAGACTCTGATGTGCCAATGCTCGGCTTCTTCCCTTGAACCTCTATAAGGAGTTGATTCTTCAAAGCTCTAGTTGGAA  
\*\*\*\*\*



|            |                                                                                                                         |
|------------|-------------------------------------------------------------------------------------------------------------------------|
| BoOR-LTR   | CTCGATTGATCAGATACGTTGCATGTGCAACAGCCTCTCCCCACATATAATTTGGAACATTTCATCGCTTTTAACATACTGGCGGTCATCTCCATTAACGTCGGTTTCTCTTTGACAA  |
| GOLDEN-LTR | CTCGATTGATCAGATACGTTGCATGTGCAACAGCCTCTCCCCACATATAATTTGGAACATTTCATCGCTTTTAACATACTGGCGGTCATCTCCATTAACGTCGGTTTCTCTTTGACAA  |
|            | *****                                                                                                                   |
| BoOR-LTR   | CGCGGTTTTCGCTGGCGTATATGGCGCAGTTAGATGTCCTCTAATACCATTTGTTGTGCAGTAATCTTGAAGTCTCTTGAAGTAAACTCTCCGCTCTATCTGTGGGAAGTTTACTA    |
| GOLDEN-LTR | CGCGGTTTTCGCTGGCGTATATGGCGCAGTTAGATGTCCTCTAATACCATTTGTTGTGCAGTAATCTTGAAGTCTCTTGAAGTAAACTCTCCGCTCTATCTGTGGGAAGTTTACTA    |
|            | *****                                                                                                                   |
| BoOR-LTR   | TTACTTTATGACCTCCTTCTCTACAAGAGCTTTAAAGGTCCTGAATTTCTCAAAAGACTTCACCTTTTCTTTGAGTAAAAAGACACATGTATCTGTGTGTCATCAATATGACAA      |
| GOLDEN-LTR | TTACTTTATGACCTCCTTCTCTACAAGAGCTTTAAAGGTCCTGAATTTCTCAAAAGACTTCACCTTTTCTTTGAGTAAAAAGACACATGTATCTGTGTGTCATCAATATGACAA      |
|            | *****                                                                                                                   |
| BoOR-LTR   | ATATGTACCGGTTCTGTGCCAGTGTGAAGGAGAGATTGGACCGCAGAGGTCAGCGTGCACAACACTCTAATACCTGCGACGACCTATGTGGTGTGACAGAGGAAAACTATTTCGAGTCT |
| GOLDEN-LTR | ATATGTACCGGTTCTGTGCCAGTGTGAAGGAGAGATTGGACCGCAGAGGTCAGCGTGCACAACACTCTAATACCTGCGACGACCTATGTGGTGTGACAGAGGAAAACTATTTCGAGTCT |
|            | *****                                                                                                                   |
| BoOR-LTR   | GTTTCCCAACGAGACAGACTCACAAAGCTTCTTCTCTCGTTGATCTCAGGTAGTCTCGAACCATCTCGAGTTTGGCATGTCTTTATCGTCTTGAAGTTGATATGGCAAGGCGTG      |
| GOLDEN-LTR | GTTTCCCAACGAGACAGACTCACAAAGCTTCTTCTCTCGTTGATCTCAGGTAGTCTCGAACCATCTCGAGTTTGGCATGTCTTTATCGTCTTGAAGTTGATATGGCAAGGCGTG      |
|            | *****                                                                                                                   |
| BoOR-LTR   | CGTGCCATCTCCACGGTTCTTCATTAATCTTTGTGGAAGGCAGCTTGGTTTCCAACCTTTGAGTGATACCTTGTAGAGACGATTAGGTGATCTTAAGACTTTTACAAGTAACCTCCGCG |
| GOLDEN-LTR | CGTGCCATCTCCACGGTTCTTCATTAATCTTTGTGGAAGGCAGCTTGGTTTCCAACCTTTGAGTGATACCTTGTAGAGACGATTAGGTGATCTTAAGACTTTTACAAGTAACCTCCGCG |
|            | *****                                                                                                                   |
| BoOR-LTR   | TTGGATCTCTCAAAAGTCAGATAGTTATCTTTCATTCTTACATCACAGCCTTGTTCAGTGTCTTGGCTAGGCTCAGAATGTTGCTTCTTAACCTGGTATATAATATATATTAGTTAGAA |
| GOLDEN-LTR | TTGGATCTCTCAAAAGTCAGATAGTTATCTTTCATTCTTACATCACAGCCTTGTTCAGTGTCTTGGCTAGGCTCAGAATGTTGCTTCTTAACCTGGTATATAATATATATTAGTTAGAA |
|            | *****                                                                                                                   |
| BoOR-LTR   | GCTTTTGCCTCCCGTCTTTGCTTCAAGATAATTGAGCCTTTGCCATTGATTTTACACATGATCCATCACCAAACCTTAACCTTCCCTTGATCTTCAATTGAGTTCGGAGAAGAGC     |
| GOLDEN-LTR | GCTTTTGCCTCCCGTCTTTGCTTCAAGATAATTGAGCCTTTGCCATTGATTTTACACATGATCCATCACCAAACCTTAACCTTCCCTTGATCTTCAATTGAGTTCGGAGAAGAGC     |
|            | *****                                                                                                                   |
| BoOR-LTR   | TCTTGTCTCCTGTCATATGATTACTAGCACCGTTGTCAAGATACCAATTACCATCATCAGTTTGTGTTTGCTCAAGTTCTTTGGCATCAGCCTTCTTCATTCAAAAACACACCTTCAT  |
| GOLDEN-LTR | TCTTGTCTCCTGTCATATGATTACTAGCACCGTTGTCAAGATACCAATTACCATCATCAGTTTGTGTTTGCTCAAGTTCTTTGGCATCAGCCTTCTTCATTCAAAAACACACCTTCAT  |
|            | *****                                                                                                                   |
| BoOR-LTR   | GCATGTATAATGCTGCTTCAGTACTTCTGTCTCTGCTTTGTTGAGTTGATGATCATATTCTCTCGGGACAGACAGGCAAGTGACCTTCTTGTGGCAGTGAAGACACTCGAATT       |
| GOLDEN-LTR | GCATGTATAATGCTGCTTCAGTACTTCTGTCTCTGCTTTGTTGAGTTGATGATCATATTCTCTCGGGACAGACAGGCAAGTGACCTTCTTGTGGCAGTGAAGACACTCGAATT       |
|            | *****                                                                                                                   |
| BoOR-LTR   | GAGAGTAATCCTCTTCTCTTATTCTCTCACCTCCGTTGCTACTACCAGCGCCCTTCTCTGTGCCACGACCCCTATTGGAACCTCGTCTCTGCGCTTTGGTCCATGATCGGAGT       |
| GOLDEN-LTR | GAGAGTAATCCTCTTCTCTTATTCTCTCACCTCCGTTGCTACTACCAGCGCCCTTCTCTGTGCCACGACCCCTATTGGAACCTCGTCTCTGCGCTTTGGTCCATGATCGGAGT       |
|            | *****                                                                                                                   |
| BoOR-LTR   | AGAGGAGCTTGCATTATCTTCAAGTTTCTCTCTCGCAATCTCTCTTCTCCACGCAAGCGTTCTCAAATGCTTTGAGGCGACCTACCACATCTTCGTACCTTGTGTTGTTAGGTCAA    |
| GOLDEN-LTR | AGAGGAGCTTGCATTATCTTCAAGTTTCTCTCTCGCAATCTCTCTTCTCCACGCAAGCGTTCTCAAATGCTTTGAGGCGACCTACCACATCTTCGTACCTTGTGTTGTTAGGTCAA    |
|            | *****                                                                                                                   |
| BoOR-LTR   | GAACCTGTCTAGTGTGCTGAGAGCTGAAGAAATTACTTGGCAGACATGATAGAACTTCTTACTAGTTTGTCTTCTCTATCGTATGGCCGAGTGATGCAACTGTTCCTGCAAACT      |
| GOLDEN-LTR | GAACCTGTCTAGTGTGCTGAGAGCTGAAGAAATTACTTGGCAGACATGATAGAACTTCTTACTAGTTTGTCTTCTCTATCGTATGGCCGAGTGATGCAACTGTTCCTGCAAACT      |
|            | *****                                                                                                                   |
| BoOR-LTR   | CTGATAATTTTCGGGAGAGCTATCTATCGAATCAGTATCTTTCAATTCTCAGATGATCGA                                                            |
| GOLDEN-LTR | CTGATAATTTTCGGGAGAGCTATCTATCGAATCAGTATCTTTCAATTCTCAGATGATCGA-----ACTCAATCATCAGTGTGTCAGGCGTGCTTCTATTACTCGATCA            |
|            | *****                                                                                                                   |
| BoOR-LTR   | GCTCCAATATTCAATGCTTTCATGCTTCCACATACCTTTAGGAGAGTCTTGCTCCCAACTTGTAGGATTAAGTTCTCTGGAATTCTTGAACAAGAAATCGTAGCTAGGTCATTCT     |
| GOLDEN-LTR | GCTCCAATATTCAATGCTTTCATGCTTCCACATACCTTTAGGAGAGTCTTGCTCCCAACTTGTAGGATTAAGTTCTCTGGAATTCTTGAACAAGAAATCGTAGCTAGGTCATTCT     |
|            | *****                                                                                                                   |
| BoOR-LTR   | TTCTTTTGGTCTTTGATCTGGATCAATGGTTTCCCATACCTCATGAAACCTAAATAGAACCTTCATCCTTAAAGACCAGACAGCATAGTTCGTTGTTGTGAGCATTTGGTGTGTTGACA |
| GOLDEN-LTR | TTCTTTTGGTCTTTGATCTGGATCAATGGTTTCCCATACCTCATGAAACCTAAATAGAACCTTCATCCTTAAAGACCAGACAGCATAGTTCGTTGTTGTGAGCATTTGGTGTGTTGACA |
|            | *****                                                                                                                   |
| BoOR-LTR   | GAGGGTGGTAACGCGCTTAGCTTCATAGCTGGTTTGTCTCTGAATCACTCATGATTAGATTAACCTCATGCTCTGATACCAAATAAAGTCGAGAATCCGAACCTTGGTAT          |
| GOLDEN-LTR | GAGGGTGGTAACGCGCTTAGCTTCATAGCTGGTTTGTCTCTGAATCACTCATGATTAGATTAACCTCATGCTCTGATACCAAATAAAGTCGAGAATCCGAACCTTGGTAT          |
|            | *****                                                                                                                   |
| BoOR-LTR   | ACACAAACTTAATAAACTTTTGTCTTATTAATCTTTCTAGCTTTCTCTCTTTTCTTATTAAAACTCTCTTACACTTAGGCTTCTATATAGGCAATAGAAATCTTAAC             |
| GOLDEN-LTR | ACACAAACTTAATAAACTTTTGTCTTATTAATCTTTCTAGCTTTCTCTCTTTTCTTATTAAAACTCTCTTACACTTAGGCTTCTATATAGGCAATAGAAATCTTAAC             |
|            | *****                                                                                                                   |
| BoOR-LTR   | TTATCCTATTACATATTAATCTAGGAATCTTAACTTAGCTTATCTTTATCCTAAATCTATTGTATAAGTTATTCCTCTTTTCTTTTGAATAACTTATTACTCAAGTAACCTTGAAGC   |
| GOLDEN-LTR | TTATCCTATTACATATTAATCTAGGAATCTTAACTTAGCTTATCTTTATCCTAAATCTATTGTATAAGTTATTCCTCTTTTCTTTTGAATAACTTATTACTCAAGTAACCTTGAAGC   |
|            | *****                                                                                                                   |
| BoOR-LTR   | TTATCC                                                                                                                  |
| GOLDEN-LTR | TTATCC                                                                                                                  |
|            | *****                                                                                                                   |

**Figure S5. *BoOR*-LTR and *BrGOLDEN*-LTR sequence comparison.** Red letters indicate different sites.

**BoOR** ATGTCTTGTTGGGTAGGATCTTGTCGTGTTCTACCCACCGGATCC**GTAC**GGTTCGGCTCTTTCAGTGTCAAAGCTGTCTTACCAGGGAGAAACCGAAGGCTGAGATGGCGTTTCACG  
**GOLDEN<sub>In</sub>** ATGTCTTGTTGGGTAGGATCTTGTCGTGTTCTACCCACCGGATCC**TTCC**GGTTCGGCTCTTTCAGTGTCAAAGCTGTCTTACCAGGGAGAAACCGAAGGCTGAGATGGCGTTTCACG  
**GOLDEN<sub>Del</sub>** ATGTCTTGTTGGGTAGGATCTTGTCGTGTTCTACCCACCGGATCC**TTCC**GGTTCGGCTCTTTCAGTGTCAAAGCTGTCTTACCAGGGAGAAACCGAAGGCTGAGATGGCGTTTCACG  
**GOLDEN<sub>Ldel</sub>** ATGTCTTGTTGGGTAGGATCTTGTCGTGTTCTACCCACCGGATCC**TTCC**GGTTCGGCTCTTTCAGTGTCAAAGCTGTCTTACCAGGGAGAAACCGAAGGCTGAGATGGCGTTTCACG  
 \*\*\*\*\*

**BoOR** GCCTTGGACTCAGACTCTTCTCCCTCGATTCTGATTCTCCGACAAATTCGCTGCCGGCTTTGTATCATAGAAGGACCTGAAACAGTACAGGACTTTGCCAAATGCAATTACAAGAG  
**GOLDEN<sub>In</sub>** GCCTTGGACTCAGACTCTTCTCCCTCGATTCTGATTCTCCGACAAATTCGCTGCCGGCTTTGTATCATAGAAGGACCTGAAACAGTACAGGACTTTGCCAAATGCAATTACAAGAG  
**GOLDEN<sub>Del</sub>** GCCTTGGACTCAGACTCTTCTCCCTCGATTCTGATTCTCCGACAAATTCGCTGCCGGCTTTGTATCATAGAAGGACCTGAAACAGTACAGGACTTTGCCAAATGCAATTACAAGAG  
**GOLDEN<sub>Ldel</sub>** GCCTTGGACTCAGACTCTTCTCCCTCGATTCTGATTCTCCGACAAATTCGCTGCCGGCTTTGTATCATAGAAGGACCTGAAACAGTACAGGACTTTGCCAAATGCAATTACAAGAG  
 \*\*\*\*\*

**BoOR** ATTCAAGACAACATTAGAAGCCGTCGAAACAAGATCTTCTTGCACATGGAAGAGGTACGGAGGCTAAGAATACAACAACGGATTAGAAACACAGAGCTTGGAAATCATAGACGAAGAGCAA  
**GOLDEN<sub>In</sub>** ATTCAAGACAACATTAGAAGCCGTCGAAACAAGATCTTCTTGCACATGGAAGAGGTACGGAGGCTAAGAATACAACAACGGATTAGAAACACAGAGCTTGGAAATCATAGACGAAGAGCAA  
**GOLDEN<sub>Del</sub>** ATTCAAGACAACATTAGAAGCCGTCGAAACAAGATCTTCTTGCACATGGAAGAGGTACGGAGGCTAAGAATACAACAACGGATTAGAAACACAGAGCTTGGAAATCATAGACGAAGAGCAA  
**GOLDEN<sub>Ldel</sub>** ATTCAAGACAACATTAGAAGCCGTCGAAACAAGATCTTCTTGCACATGGAAGAGGTACGGAGGCTAAGAATACAACAACGGATTAGAAACACAGAGCTTGGAAATCATAGACGAAGAGCAA  
 \*\*\*\*\*

**BoOR** GAACACGAATA-----CCTAACTTCCCCTCCTTATCCCATTTCTTACCTCCATTGACTGCTGCCAATTGAGAGTCTATTACGCA  
**GOLDEN<sub>In</sub>** GAACACGAATAAGTCGCAGAATCCGAACCTTGCTTATCCAACACGAATACCTAACTTCCCCTCCTTATCCCATTTCTTACCTCCATTGACTGCTGCCAATTGAGAGTCTATTACGCA  
**GOLDEN<sub>Del</sub>** GAACACGAATAAGTCGCAGAATCCGAACCTTG-----ACTGCTGCCAATTGAGAGTCTATTACGCA  
**GOLDEN<sub>Ldel</sub>** GAACACGAATAAGTCGCAGAATCCGAACCTTG-----  
 \*\*\*\*\*

**BoOR** ACTTGCTTCTCACTATTGCTGGGATTATCCTCTTCGGTGGCTACTAGCTCCTACTCTAGAGCTGAAGCTAGGTATAGGGGGCACATCATATAAAGATTTCAATCAAAGCCTTCATCTA  
**GOLDEN<sub>In</sub>** ACTTGCTTCTCACTATTGCTGGGATTATCCTCTTCGGTGGCTACTAGCTCCTACTCTAGAGCTGAAGCTAGGTATAGGGGGCACATCATATAAAGATTTCAATCAAAGCCTTCATCTA  
**GOLDEN<sub>Del</sub>** ACTTGCTTCTCACTATTGCTGGGATTATCCTCTTCGGTGGCTACTAGCTCCTACTCTAGAGCTGAAGCTAGGTATAGGGGGCACATCATATAAAGATTTCAATCAAAGCCTTCATCTA  
**GOLDEN<sub>Ldel</sub>** -----CTAGAGCTGAAGCTAGGTATAGGGGGCACATCATATAAAGATTTCAATCAAAGCCTTCATCTA  
 \*\*\*\*\*

**BoOR** CCTATGCAATTGAGTCAAGTAGACCCAATAGTGGCGTCATTCTCTGGAGGAGCTGTTGGTGTGATCTCAGCTTTGATGGTAGTTGAAGTTAACAACGTGAAGCAGCAAGAGCACAAGAGA  
**GOLDEN<sub>In</sub>** CCTATGCAATTGAGTCAAGTAGACCCAATAGTGGCGTCATTCTCTGGAGGAGCTGTTGGTGTGATCTCAGCTTTGATGGTAGTTGAAGTTAACAACGTGAAGCAGCAAGAGCACAAGAGA  
**GOLDEN<sub>Del</sub>** CCTATGCAATTGAGTCAAGTAGACCCAATAGTGGCGTCATTCTCTGGAGGAGCTGTTGGTGTGATCTCAGCTTTGATGGTAGTTGAAGTTAACAACGTGAAGCAGCAAGAGCACAAGAGA  
**GOLDEN<sub>Ldel</sub>** CCTATGCAATTGAGTCAAGTAGACCCAATAGTGGCGTCATTCTCTGGAGGAGCTGTTGGTGTGATCTCAGCTTTGATGGTAGTTGAAGTTAACAACGTGAAGCAGCAAGAGCACAAGAGA  
 \*\*\*\*\*

**BoOR** TGCAAACTACTGTCTAGGAAGTGGGTATCTAGCATGTGCCGTTGCTCTAGCACAGGTTCTCTTATTATATCTGAACAGTCTCAGCTATTGCTGGAGGGAACCATCTGTATCAACATCC  
**GOLDEN<sub>In</sub>** TGCAAACTACTGTCTAGGAAGTGGGTATCTAGCATGTGCCGTTGCTCTAGCACAGGTTCTCTTATTATATCTGAACAGTCTCAGCTATTGCTGGAGGGAACCATCTGTATCAACATCC  
**GOLDEN<sub>Del</sub>** TGCAAACTACTGTCTAGGAAGTGGGTATCTAGCATGTGCCGTTGCTCTAGCACAGGTTCTCTTATTATATCTGAACAGTCTCAGCTATTGCTGGAGGGAACCATCTGTATCAACATCC  
**GOLDEN<sub>Ldel</sub>** TGCAAACTACTGTCTAGGAAGTGGGTATCTAGCATGTGCCGTTGCTCTAGCACAGGTTCTCTTATTATATCTGAACAGTCTCAGCTATTGCTGGAGGGAACCATCTGTATCAACATCC  
 \*\*\*\*\*

**BoOR** AAAACCGAAAGATGTTCAAACGTGTTCTGGTGCTGGAAAGGTGATGTGTCCGACATGTCTGTGCACAGGA**ATGG**CTATGGCTAGCGAGCAGCACCCCTCGTATTGATCCCTTCCTTTGA  
**GOLDEN<sub>In</sub>** AAAACCGAAAGATGTTCAAACGTGTTCTGGTGCTGGAAAGGTGATGTGTCCGACATGTCTGTGCACAGGA**ATGG**CTATGGCTAGCGAGCAGCACCCCTCGTATTGATCCCTTCCTTTGA  
**GOLDEN<sub>Del</sub>** AAAACCGAAAGATGTTCAAACGTGTTCTGGTGCTGGAAAGGTGATGTGTCCGACATGTCTGTGCACAGGA**ATGG**CTATGGCTAGCGAGCAGCACCCCTCGTATTGATCCCTTCCTTTGA  
**GOLDEN<sub>Ldel</sub>** AAAACCGAAAGATGTTCAAACGTGTTCTGGTGCTGGAAAGGTGATGTGTCCGACATGTCTGTGCACAGGA**ATGG**CTATGGCTAGCGAGCAGCACCCCTCGTATTGATCCCTTCCTTTGA  
 \*\*\*\*\*

**Figure S6. Three transcripts of the *BrGOLDEN* and open reading frames of *BoOR* sequence comparison. Red letters indicated different sites.**

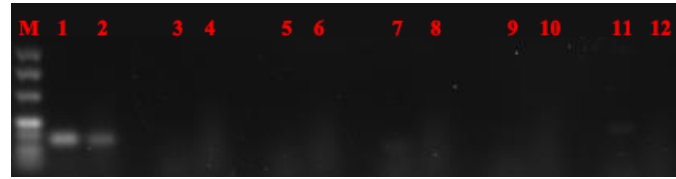

**Figure S7. RT-PCR detection of specific regulatory elements.** M: Marker 500 bp; The specific expressions of primers *Bractin* (lanes 1 and 2), *CaMV* 35S promoter (lanes 3 and 4), *FMV* 35S promoter (lanes 5 and 6), *NOS* promoter (lanes 7 and 8), *NOS* terminator (lanes 9 and 10) and *CaMV* 35S terminator (lanes 11 and 12) were detected in the ‘1900264’ and ‘1900262’ lines.
